# Supplementary material for: Serine hydroxymethyltransferase 2 knockdown induces apoptosis in ccRCC by causing lysosomal membrane permeabilization via metabolic reprogramming
Source: PubMed Central journal article supplement (PMC9941282; doi:10.1038/s41419-023-05677-4), 2023-02-20

Figure 1C

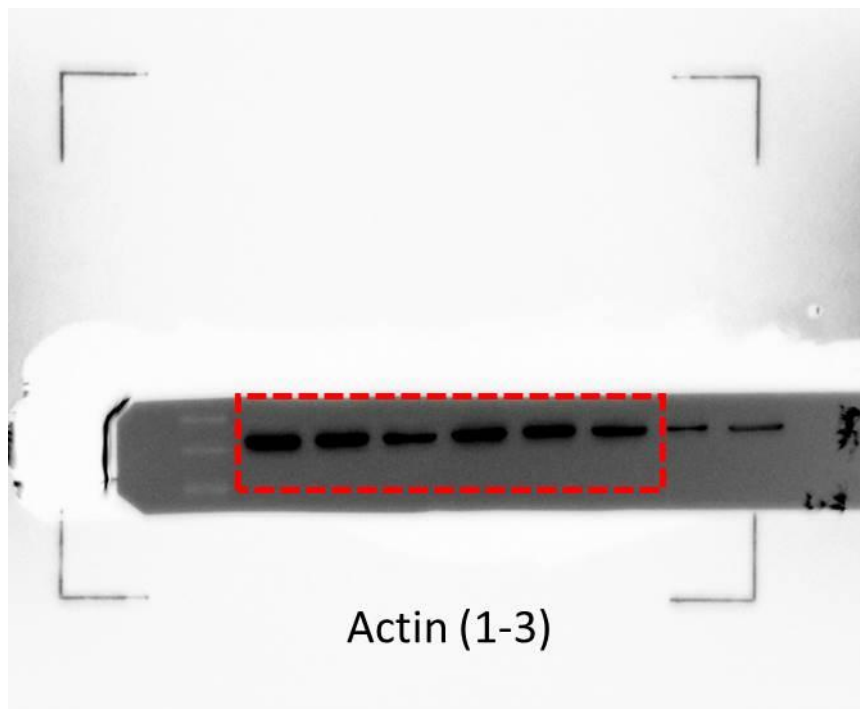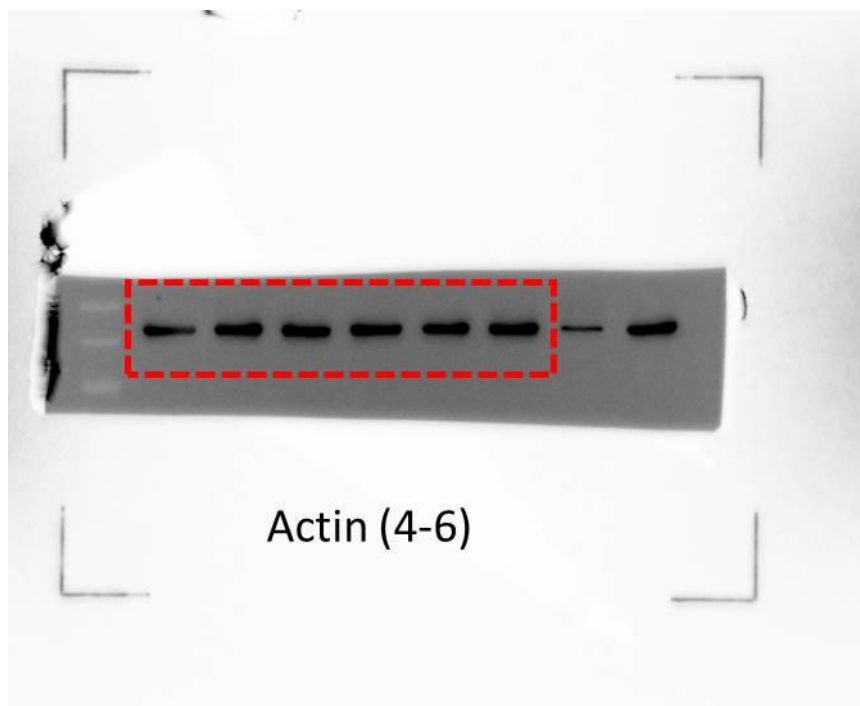

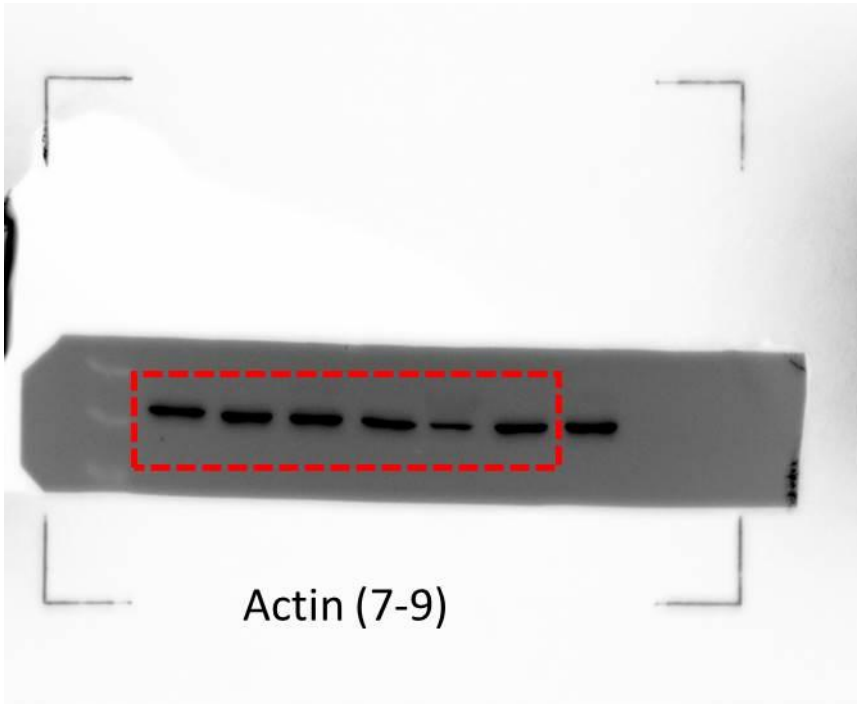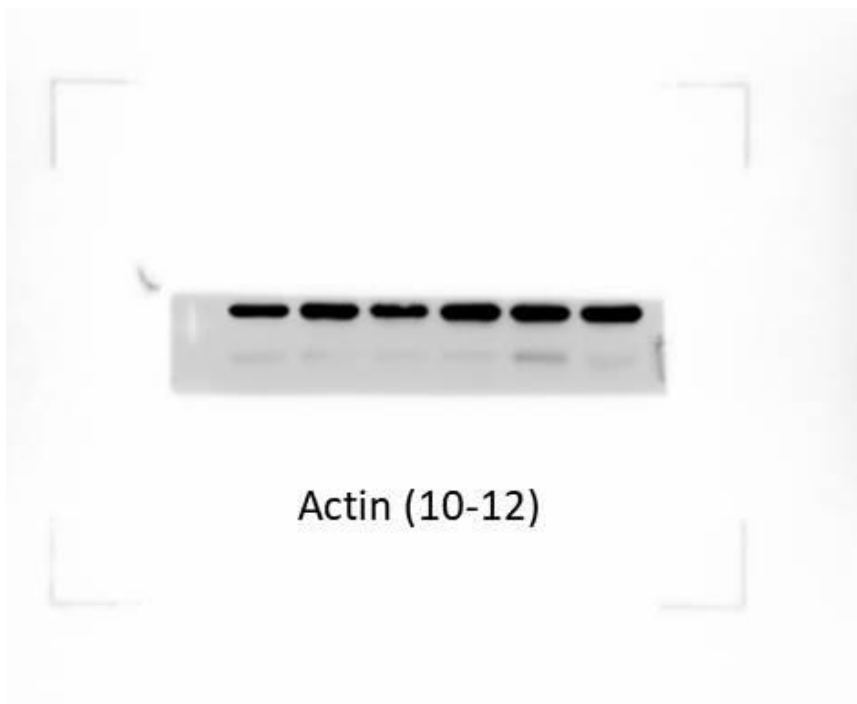

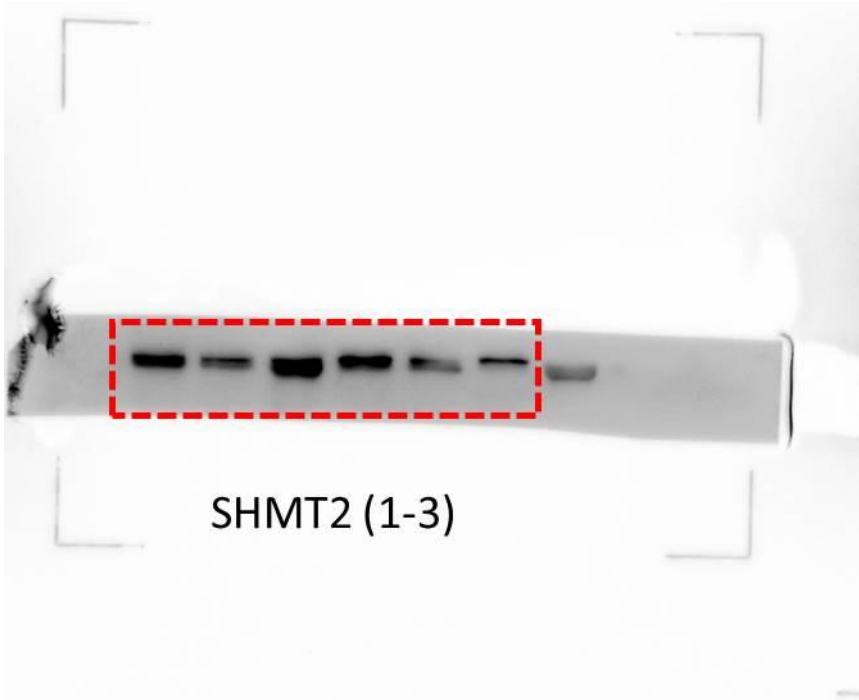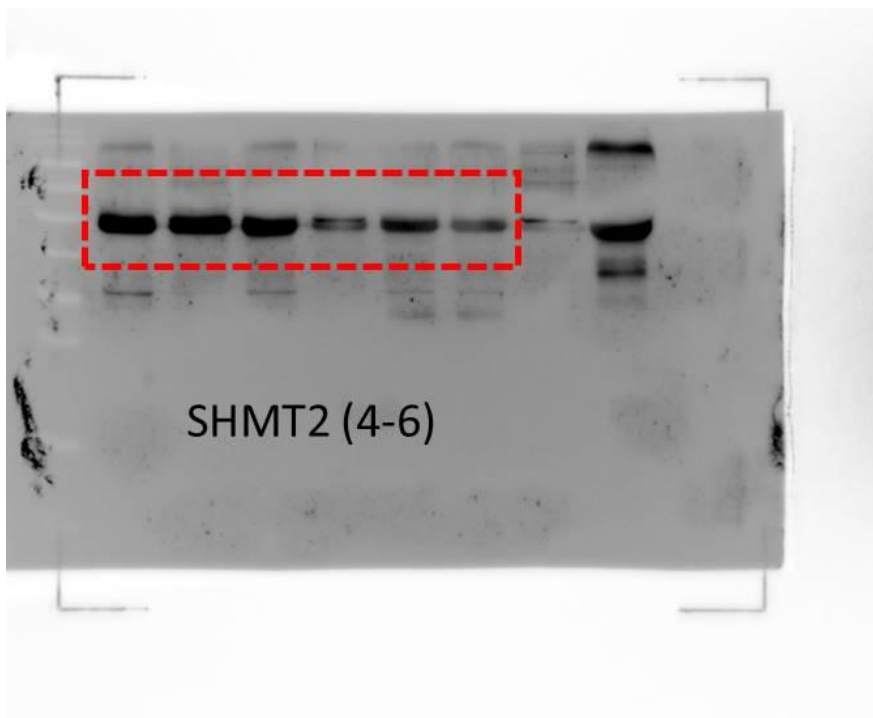

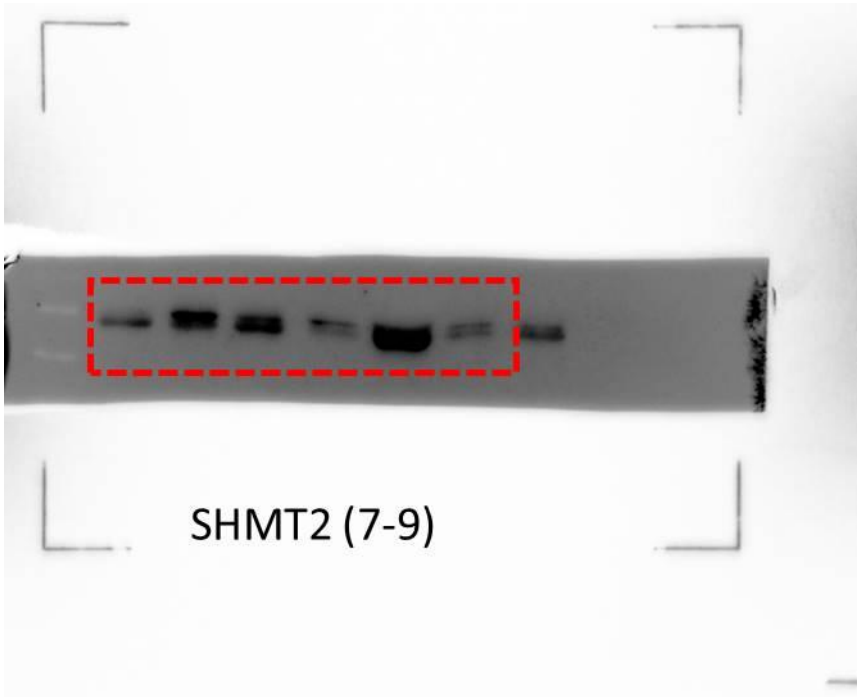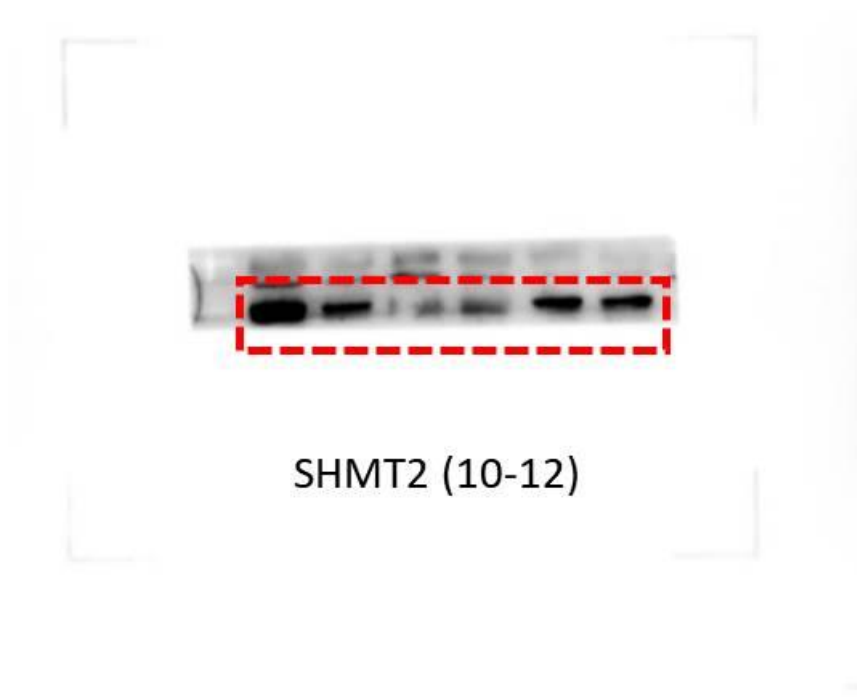

**Figure 2A**

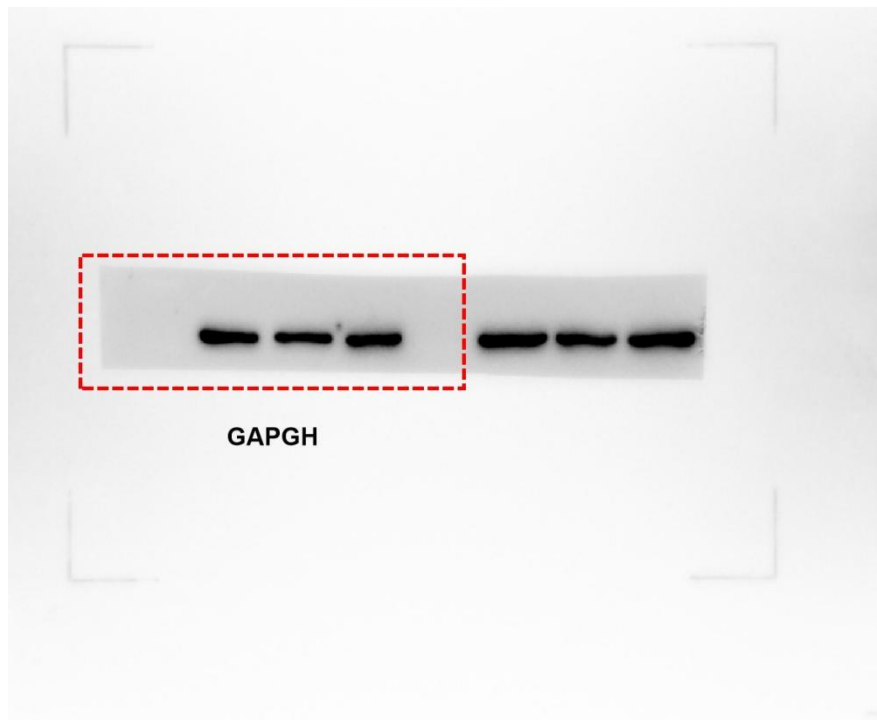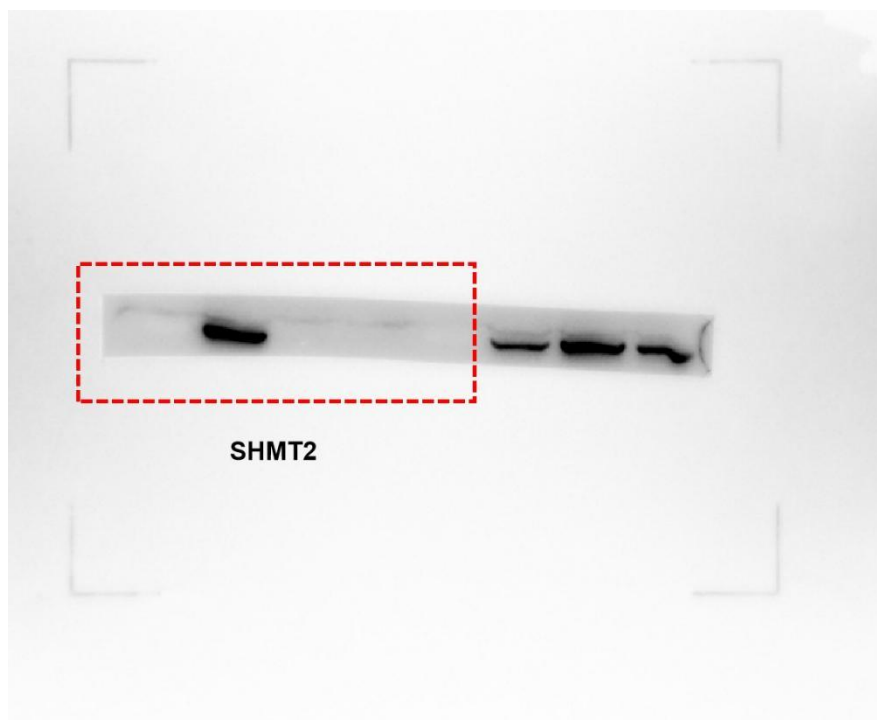

**Figure 3A**

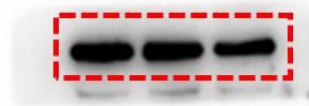

**GAPDH**

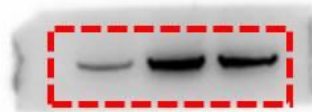

**SHMT2**

**Figure 4C (ACHN-siSHMT2)**

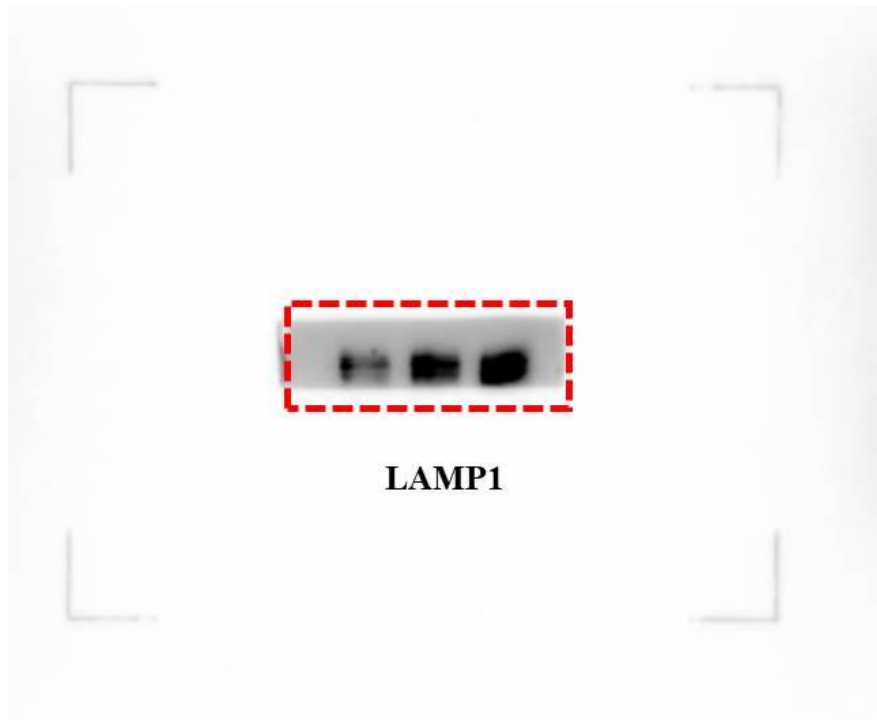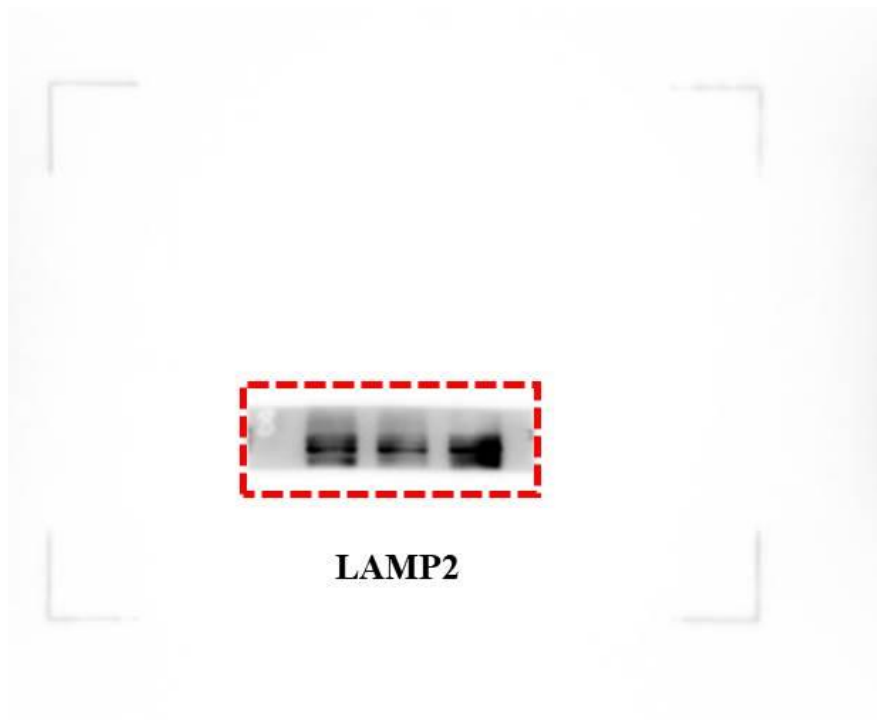

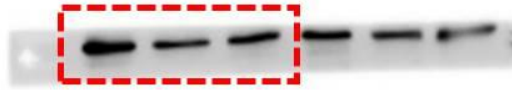

**p62**

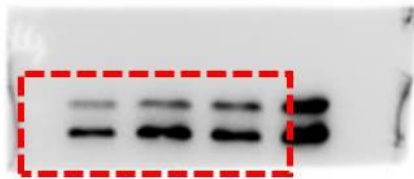

**LC3**



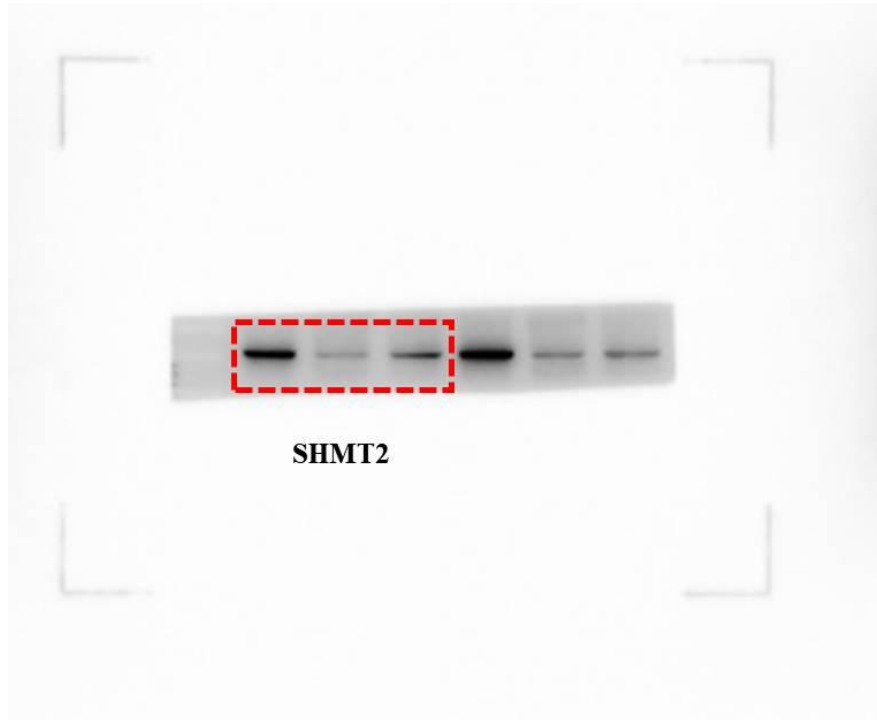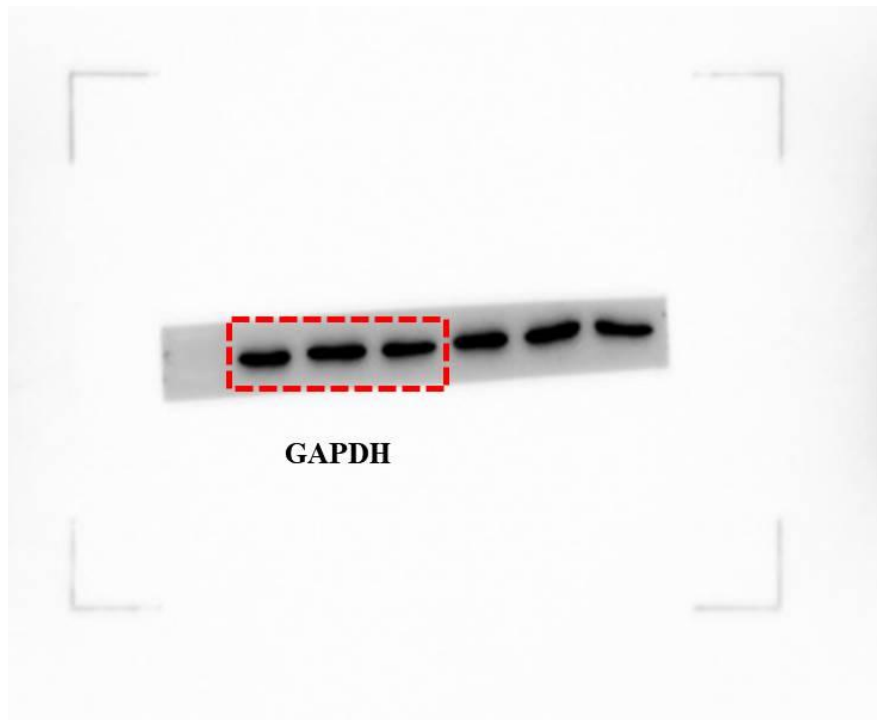

**Figure 4C (ACHN-shSHMT2)**

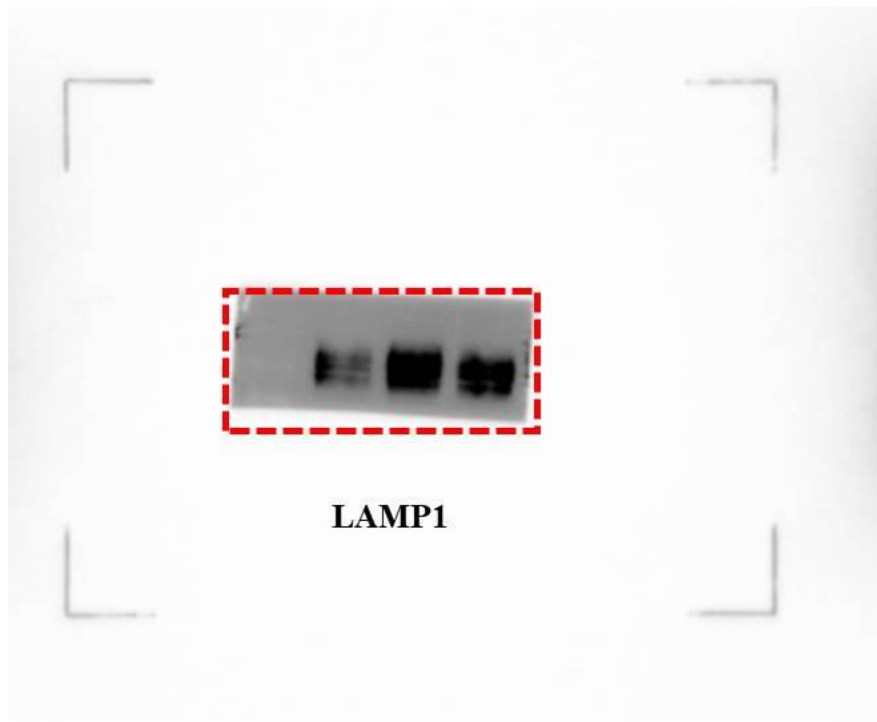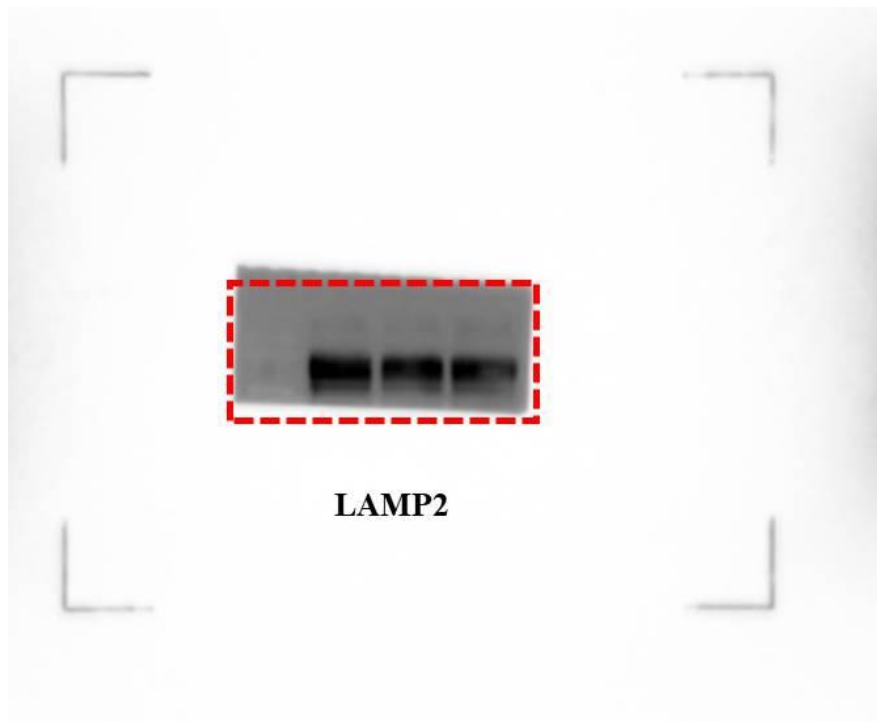

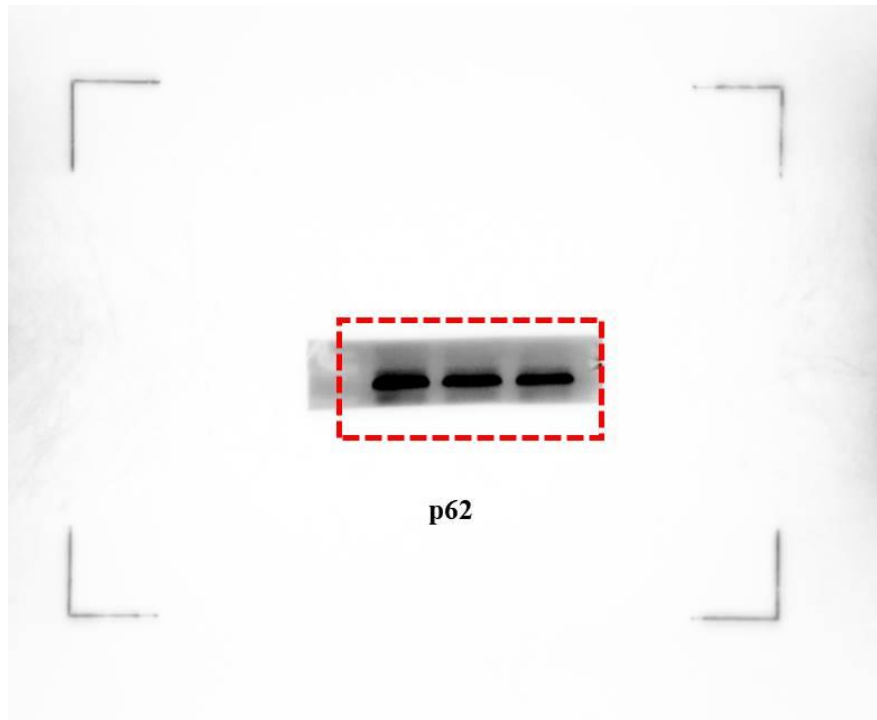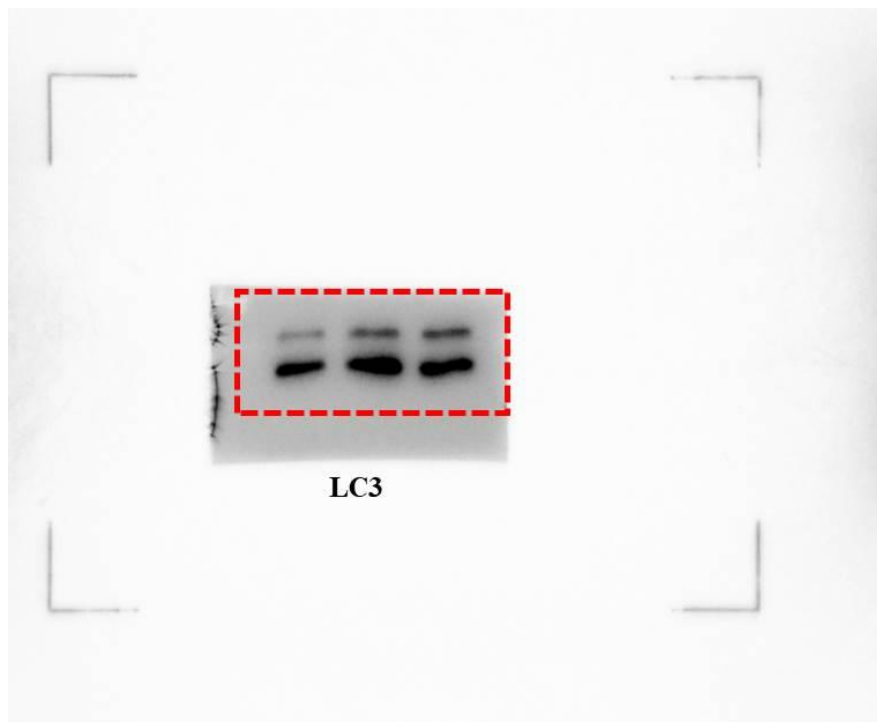

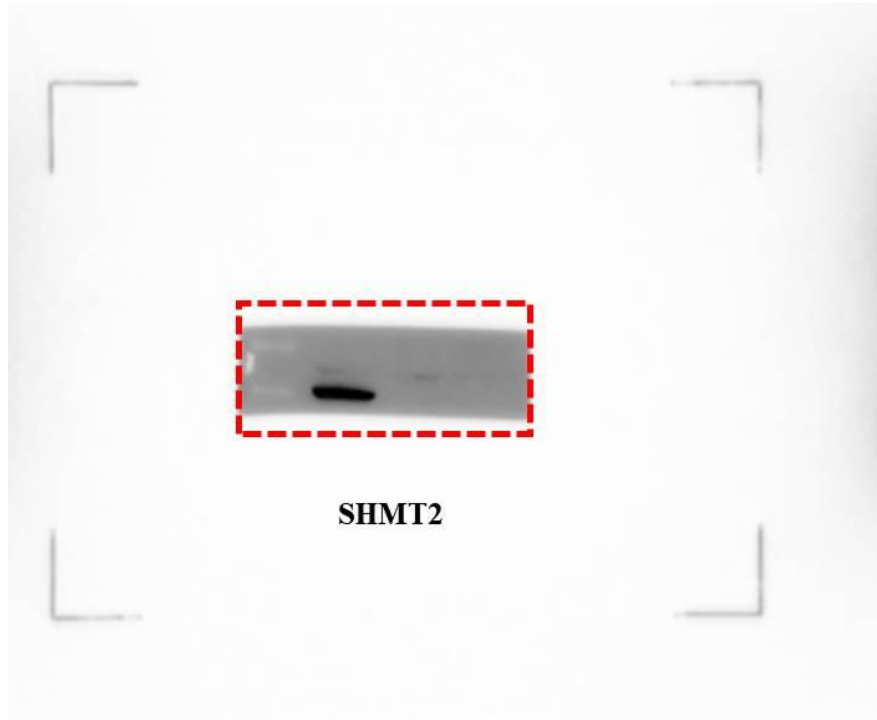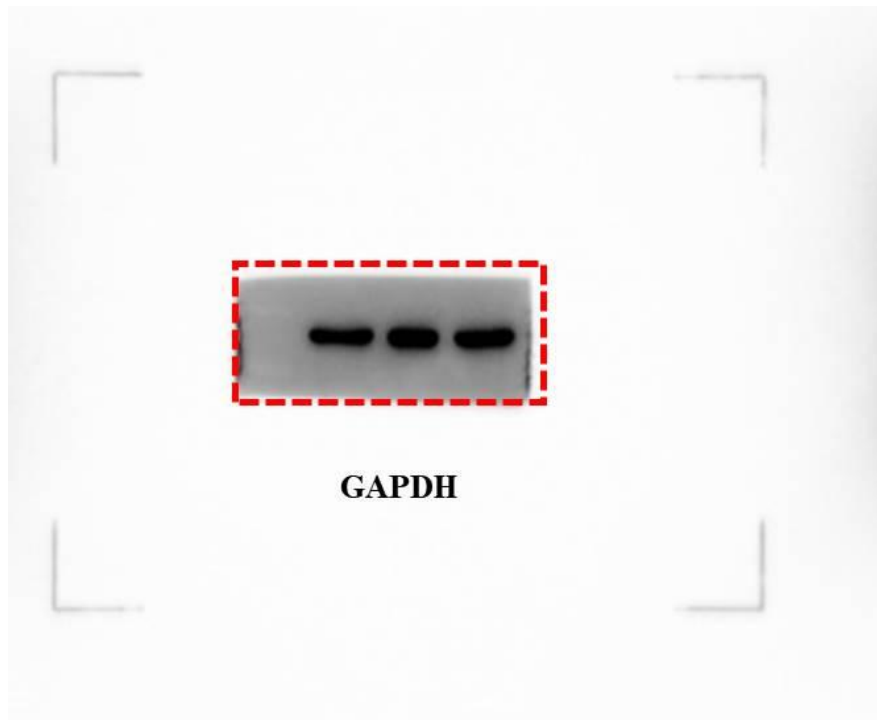

**Figure 4C (Caki-SHMT2)**

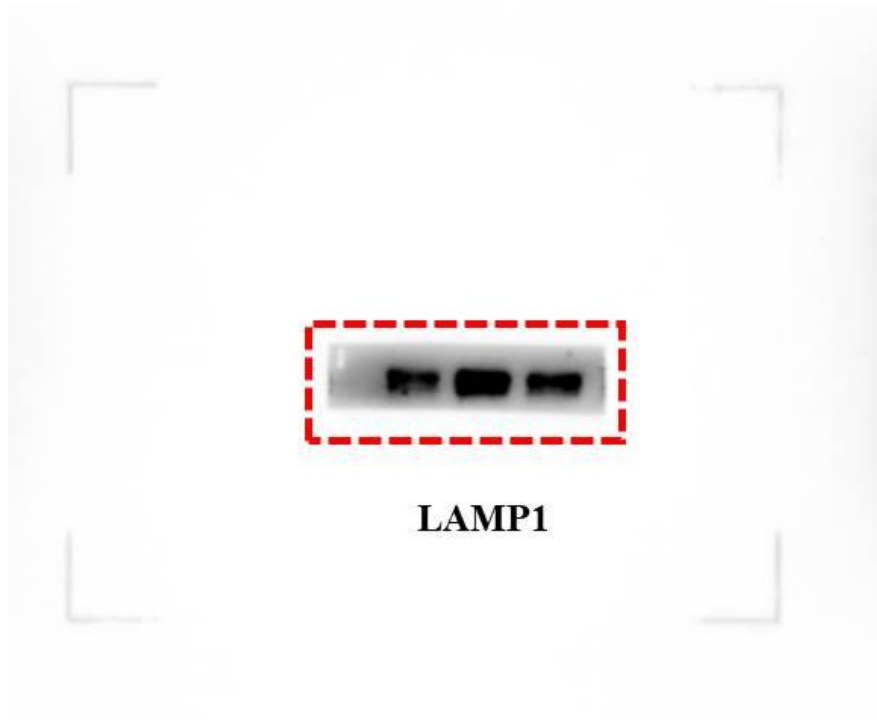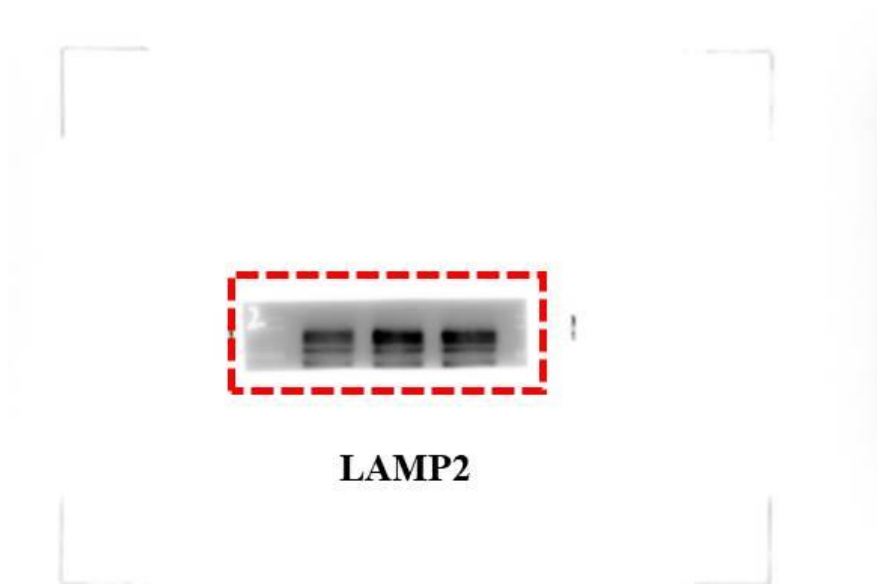

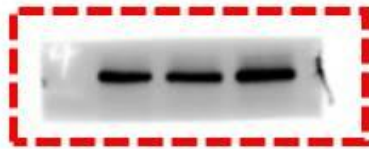

**p62**

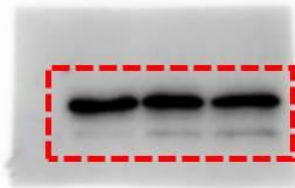

**LC3**

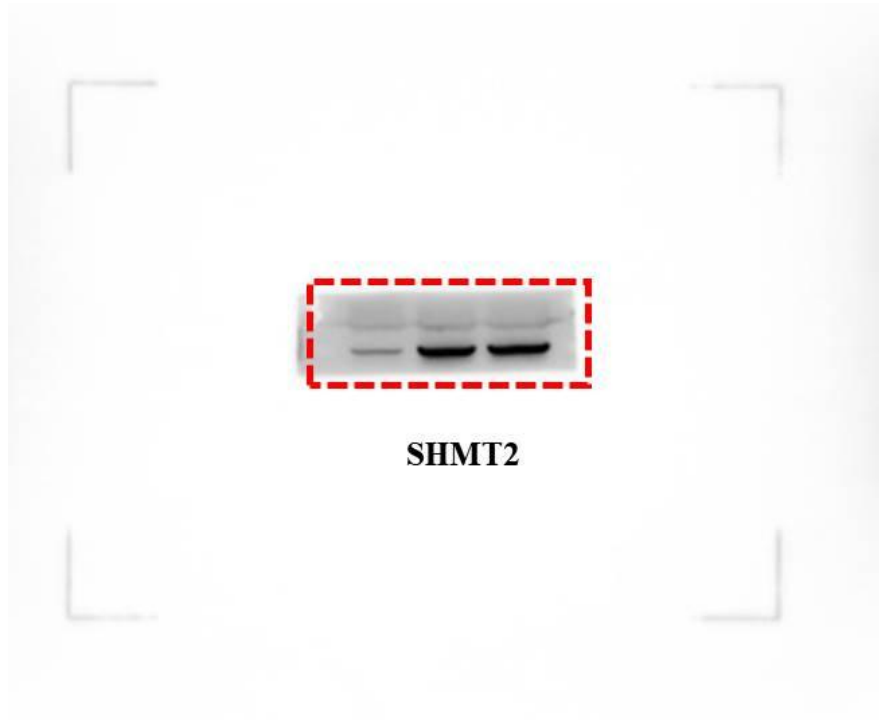

**SHMT2**

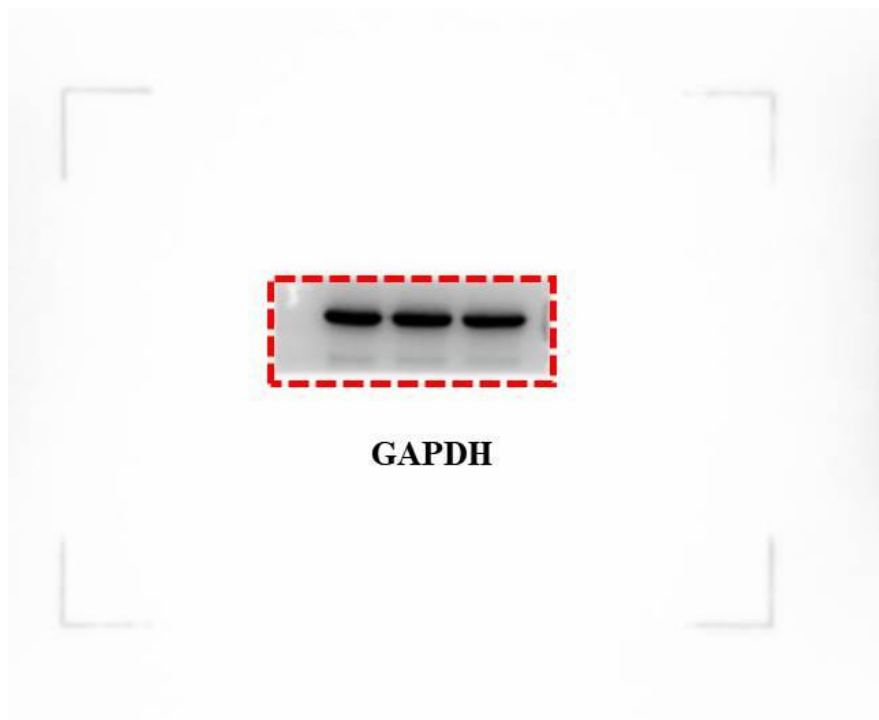

**GAPDH**

**Figure 5D**

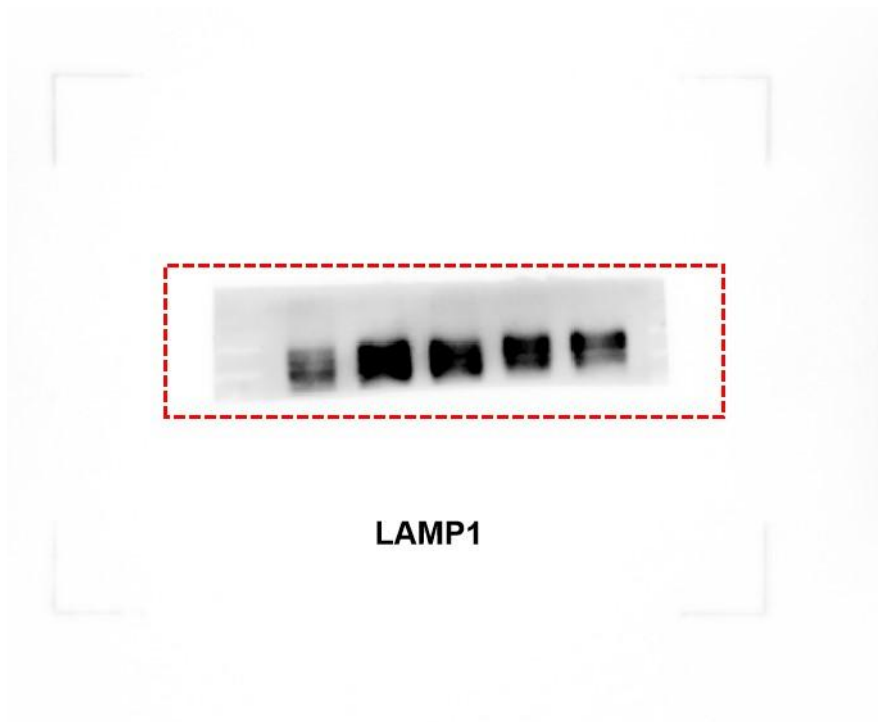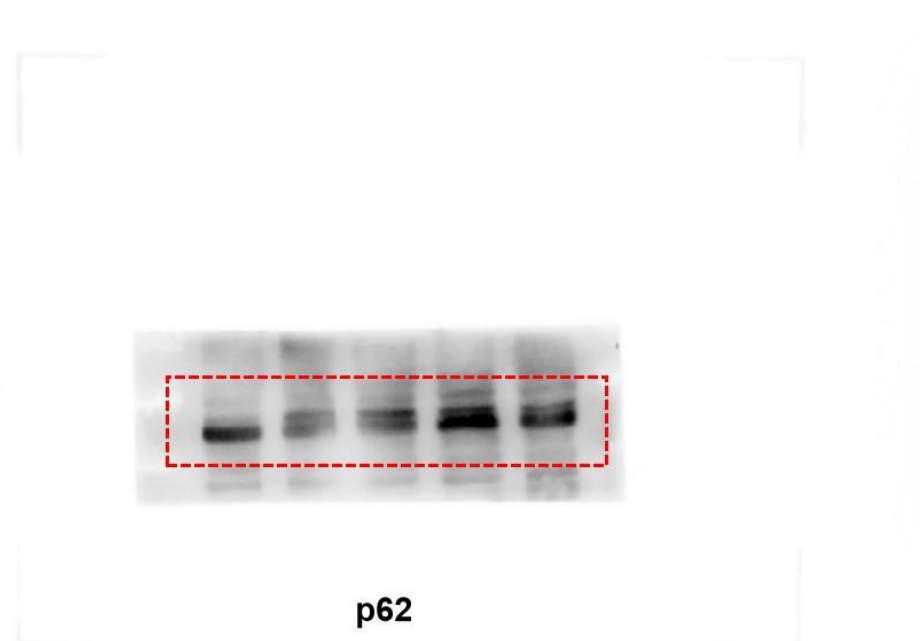



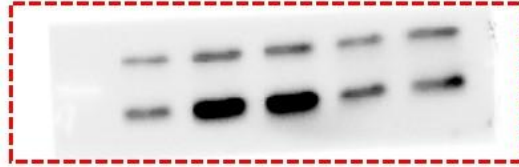

**LC3**

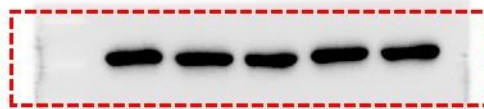

**caspase 3**

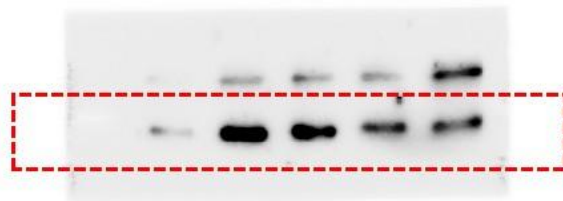

**cleaved caspase 3**

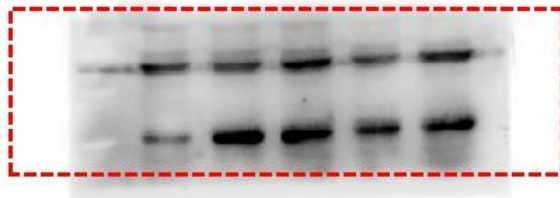

**caspase 9 & cleaved caspase 9**

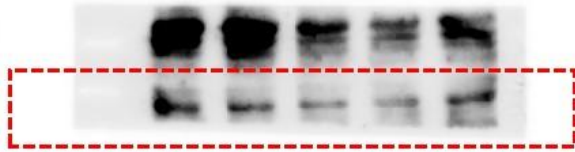

**Bcl-2**

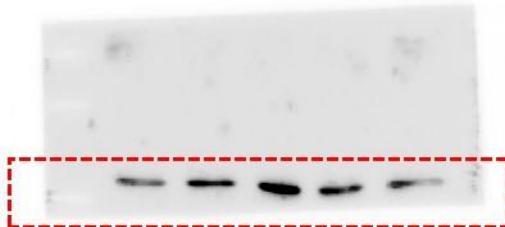

**Bax**

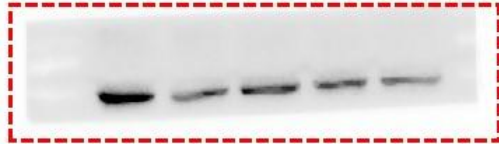

**SHMT2**

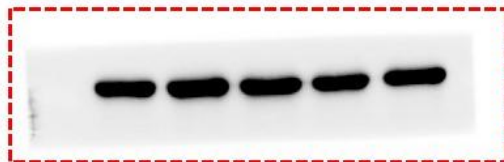

**GAPDH**

**Figure 5G**

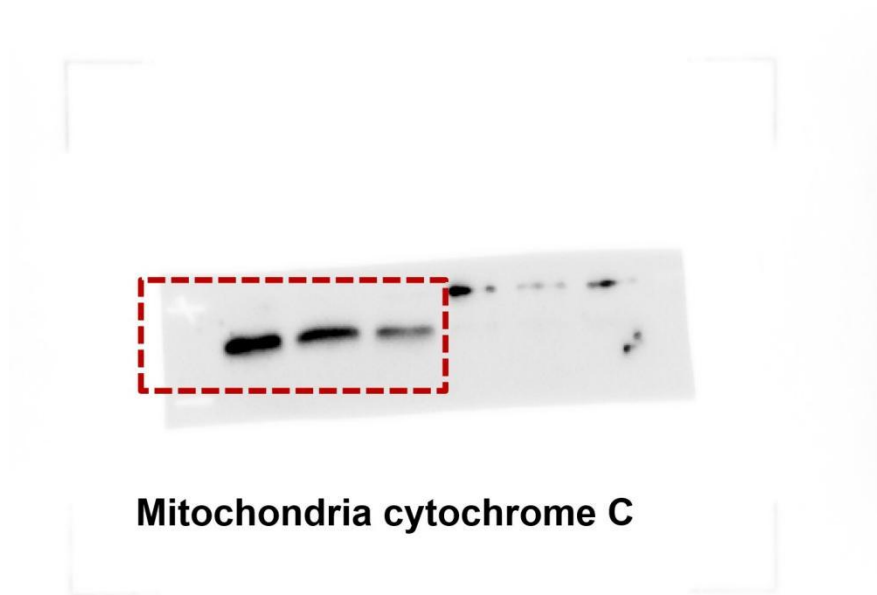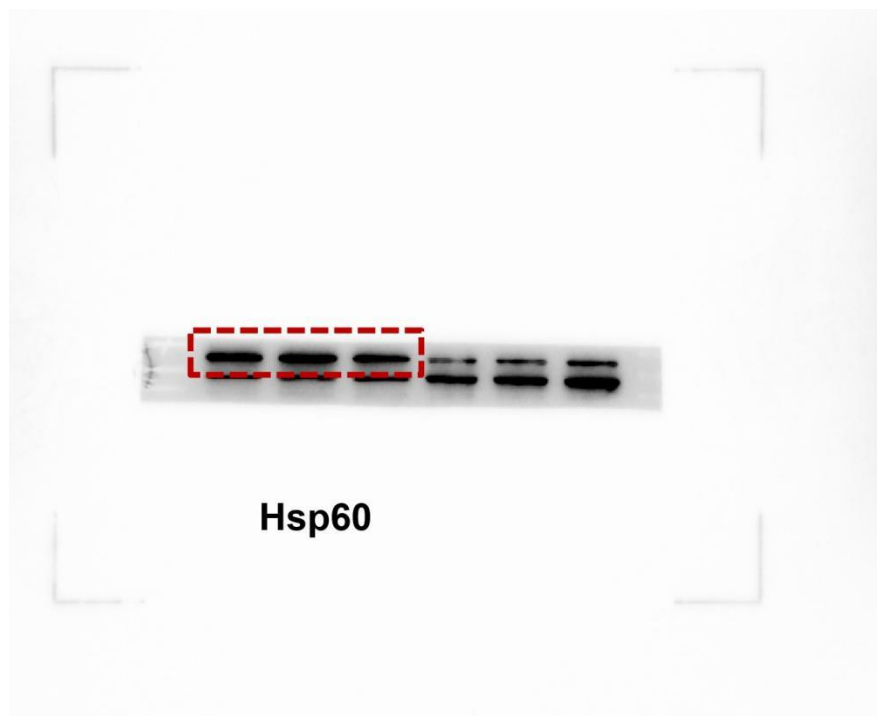

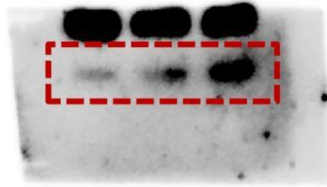

**Cytoplasm  
cytochrome C**

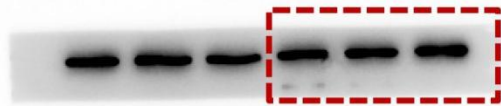

**GAPDH**

**Figure S1A**

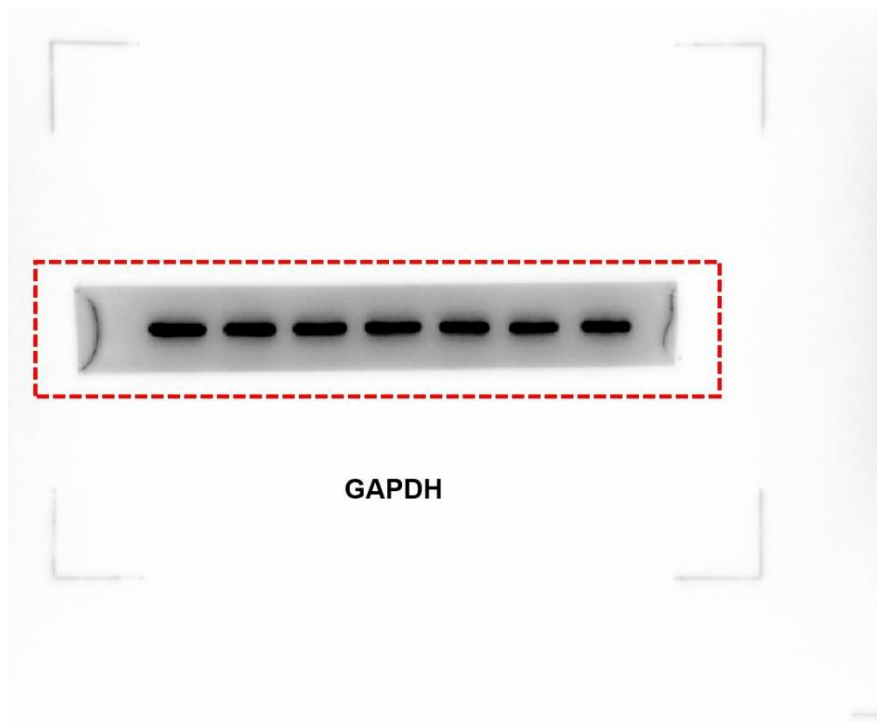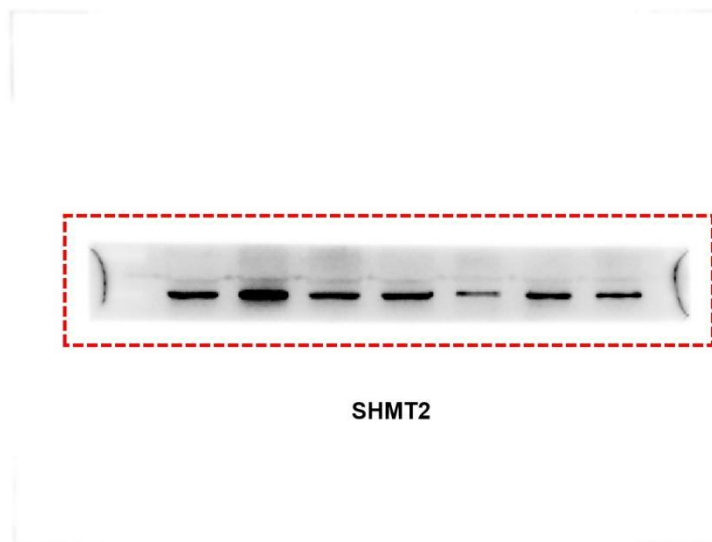

**Figure S1B--ACHN**

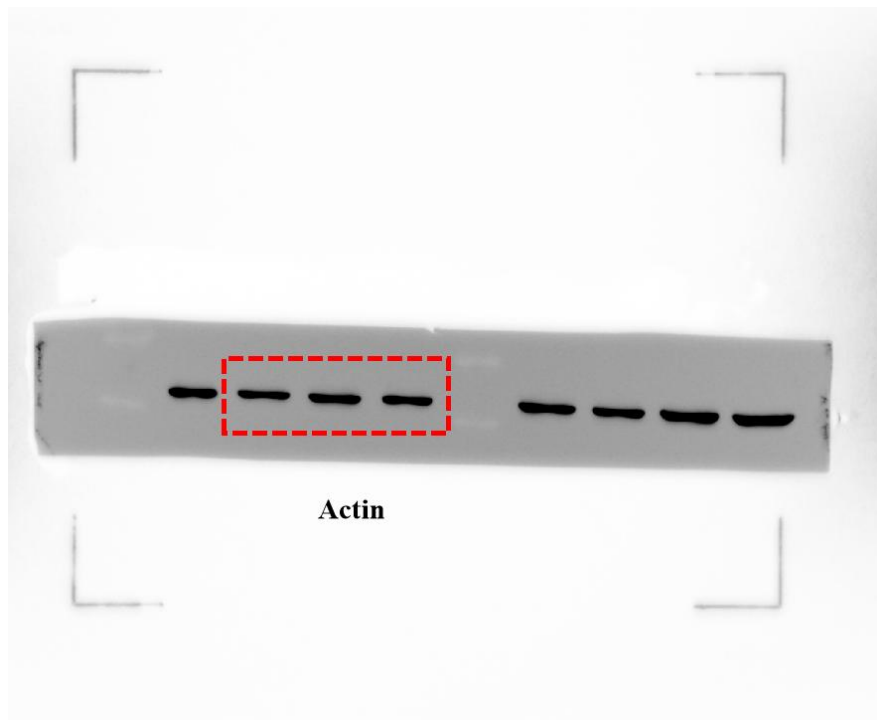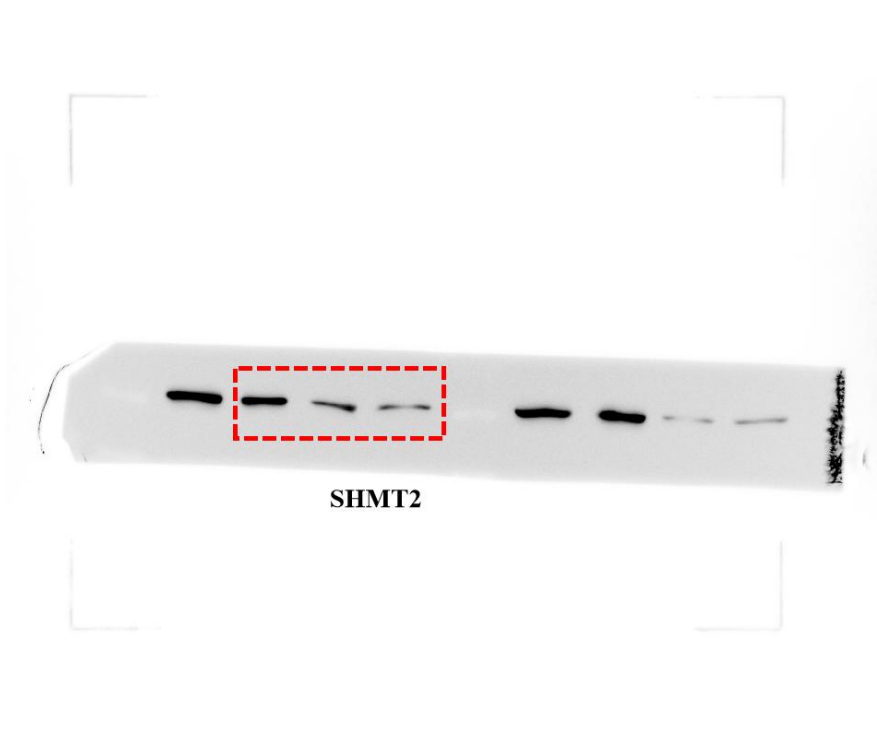



Figure S1B--A498

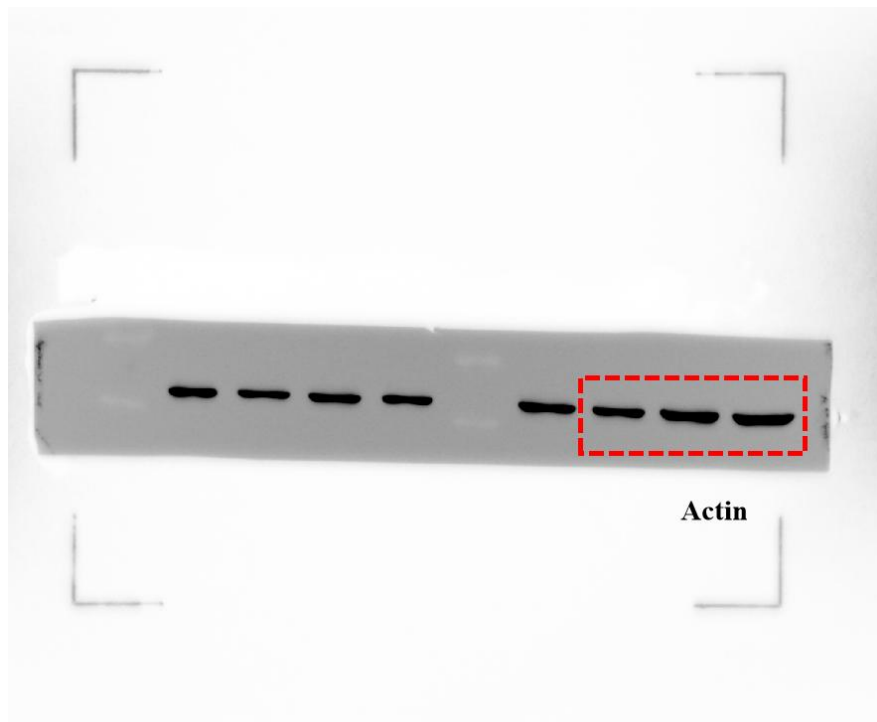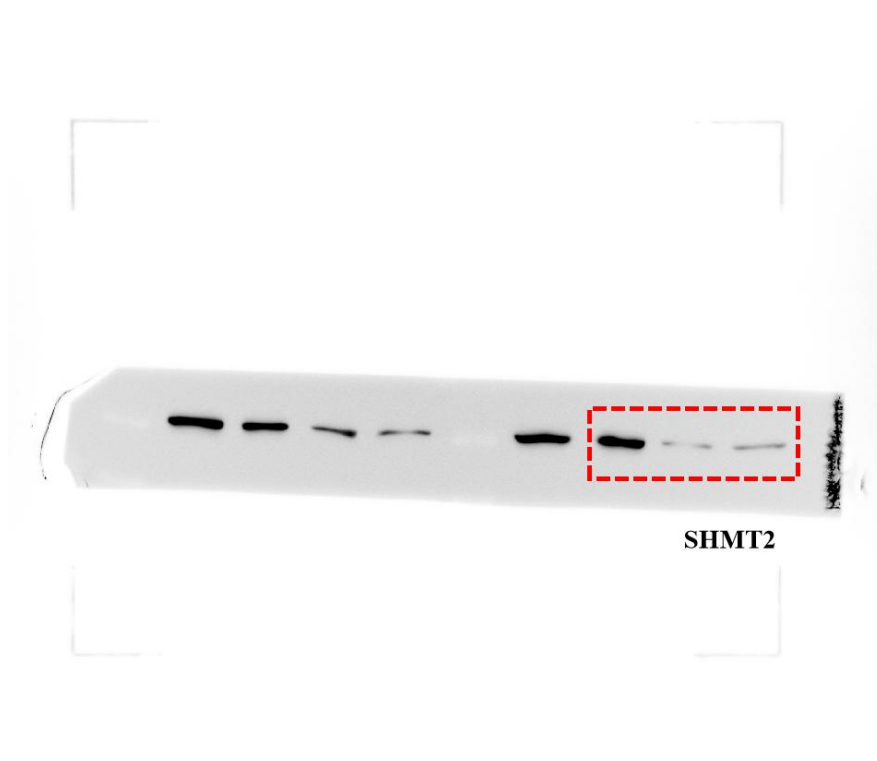

Figure S2- A498

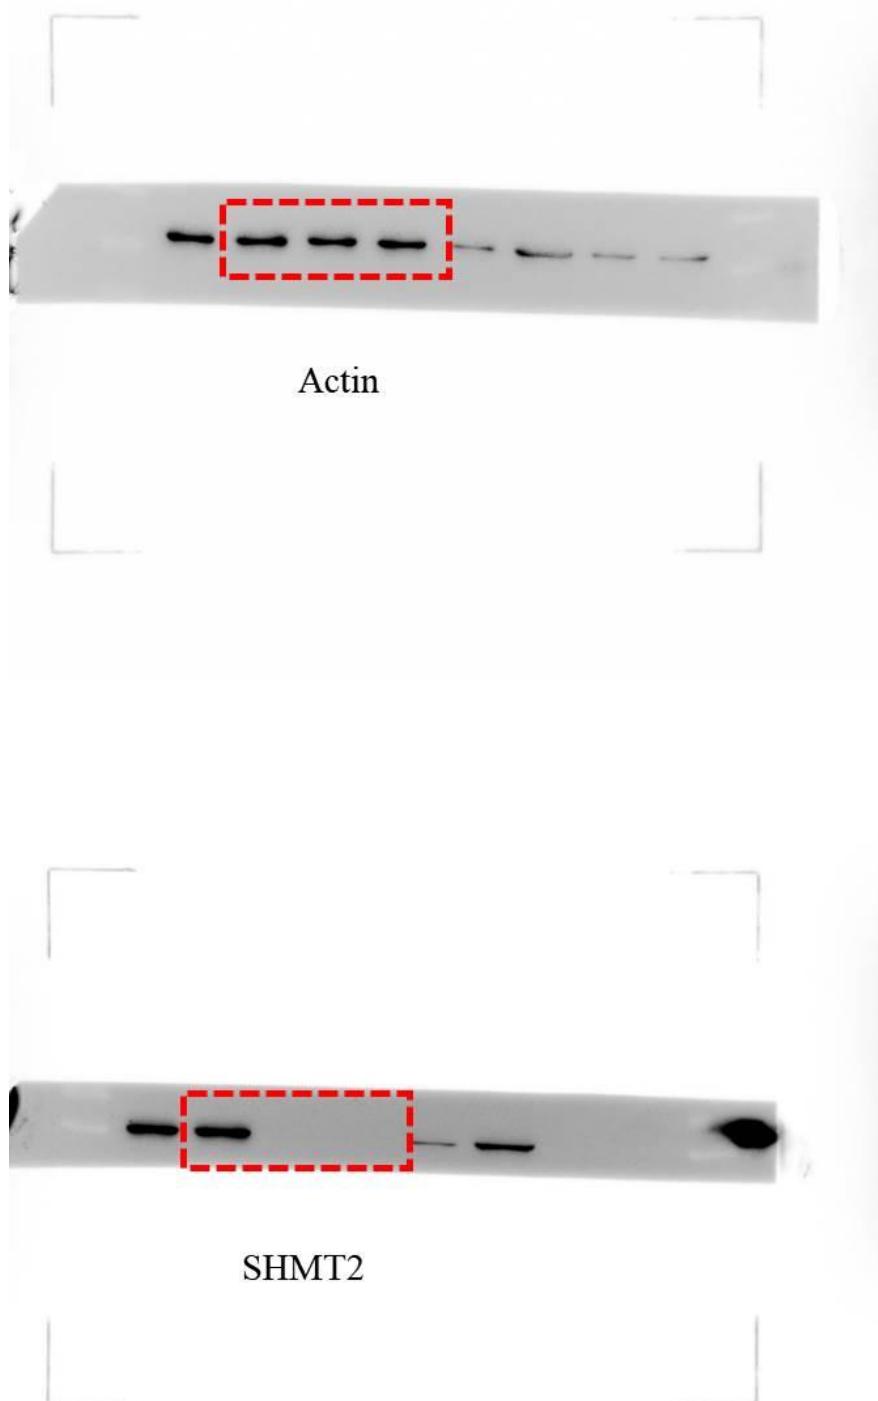

Figure S2- 786-O

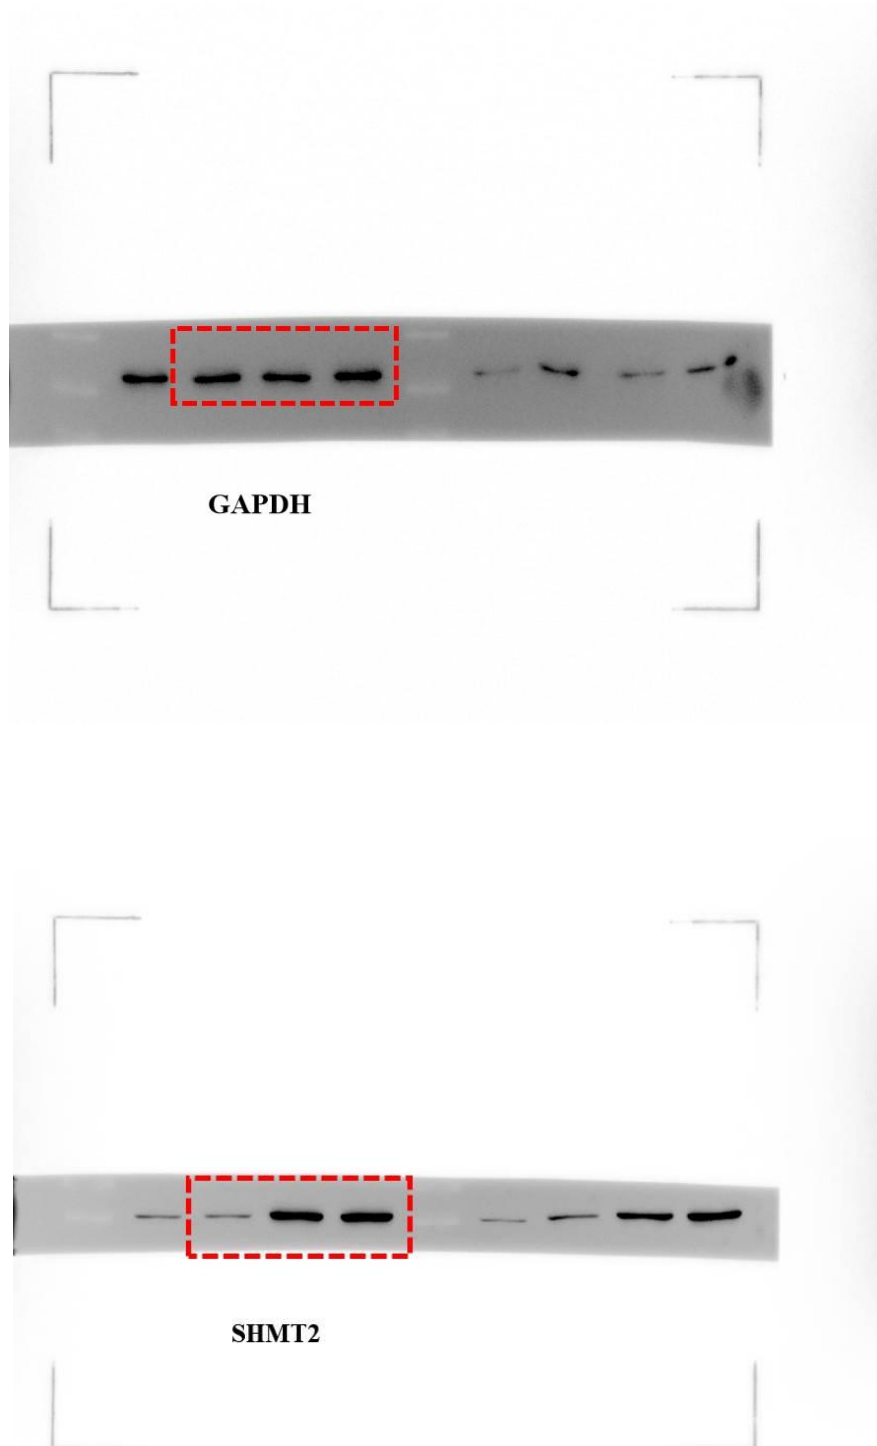

**Figure S5A**

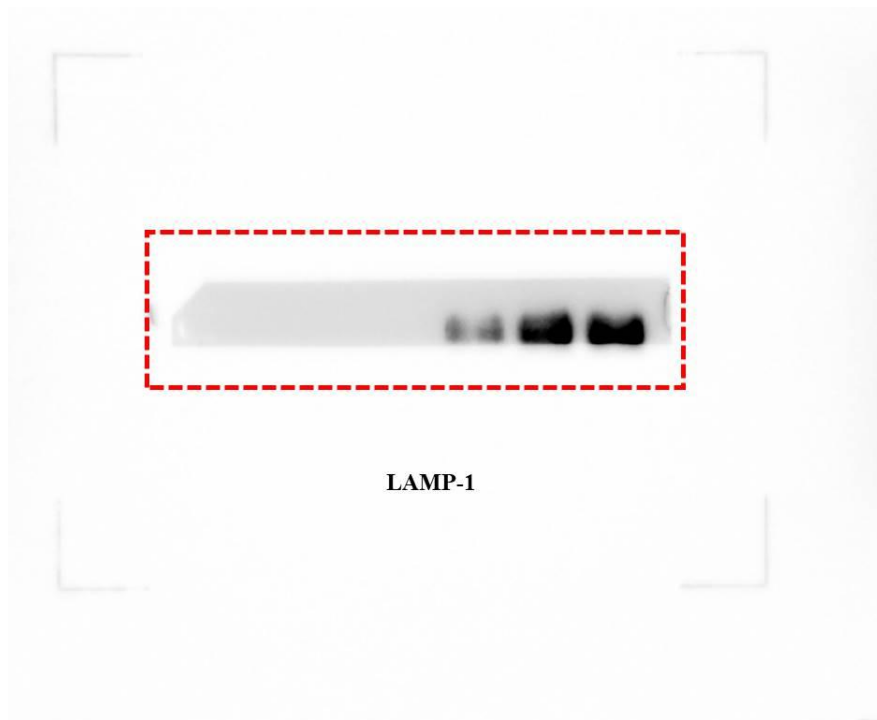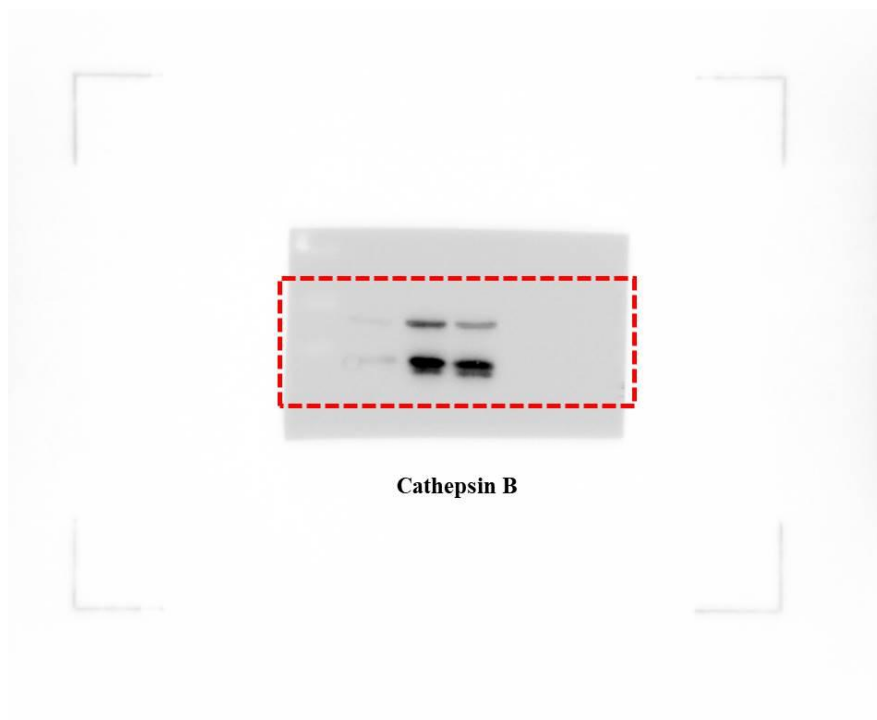

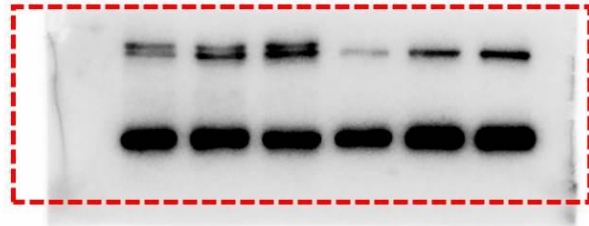

**Cathepsin D**

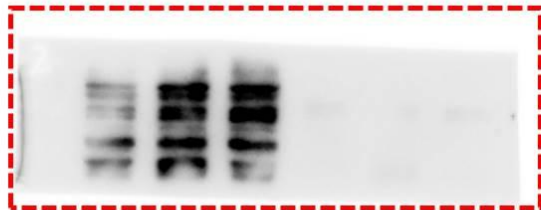

**Cathepsin L**

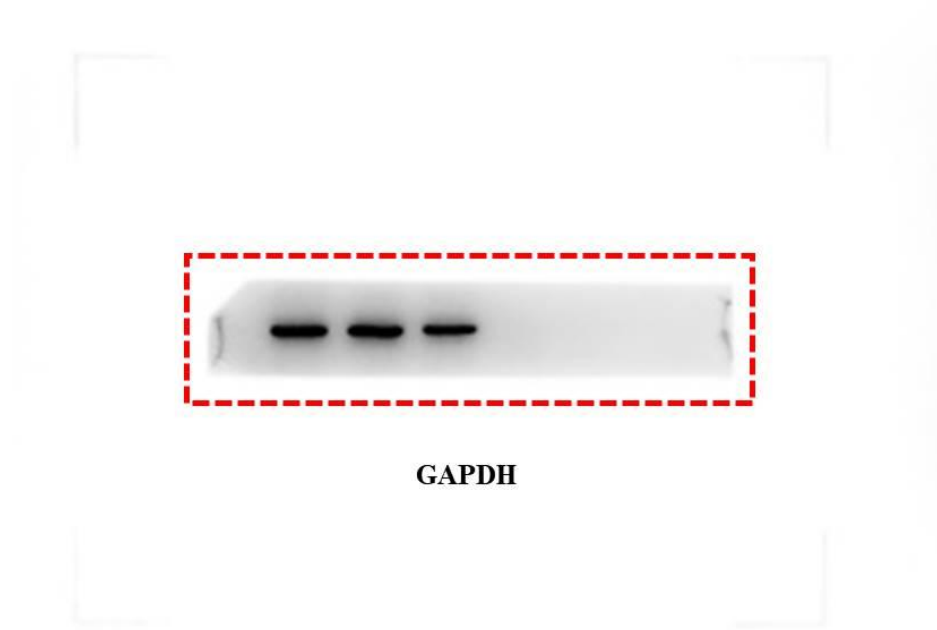

**GAPDH**

**Figure S6E**

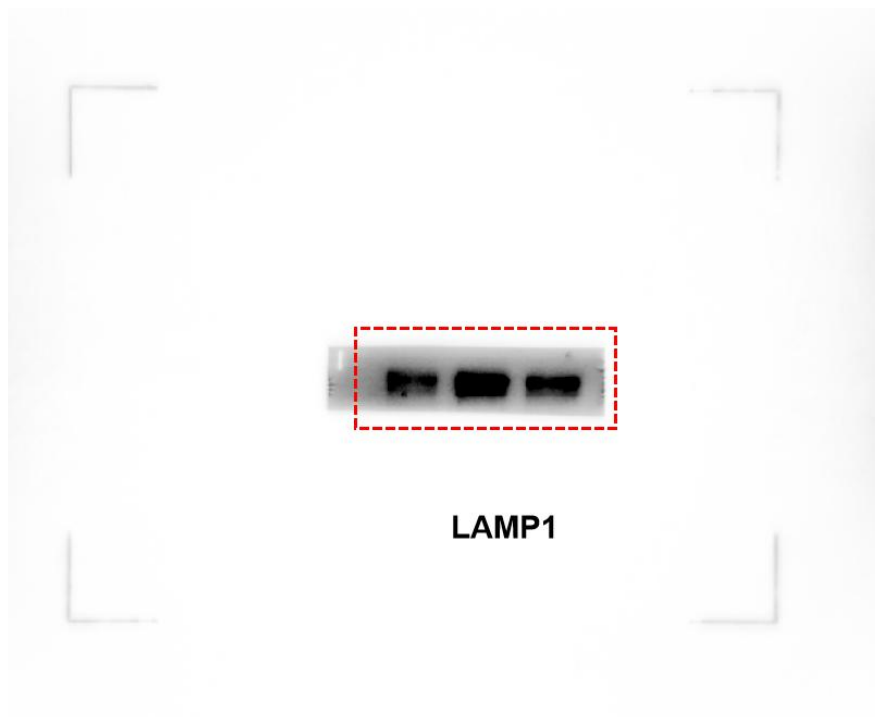

**LAMP1**

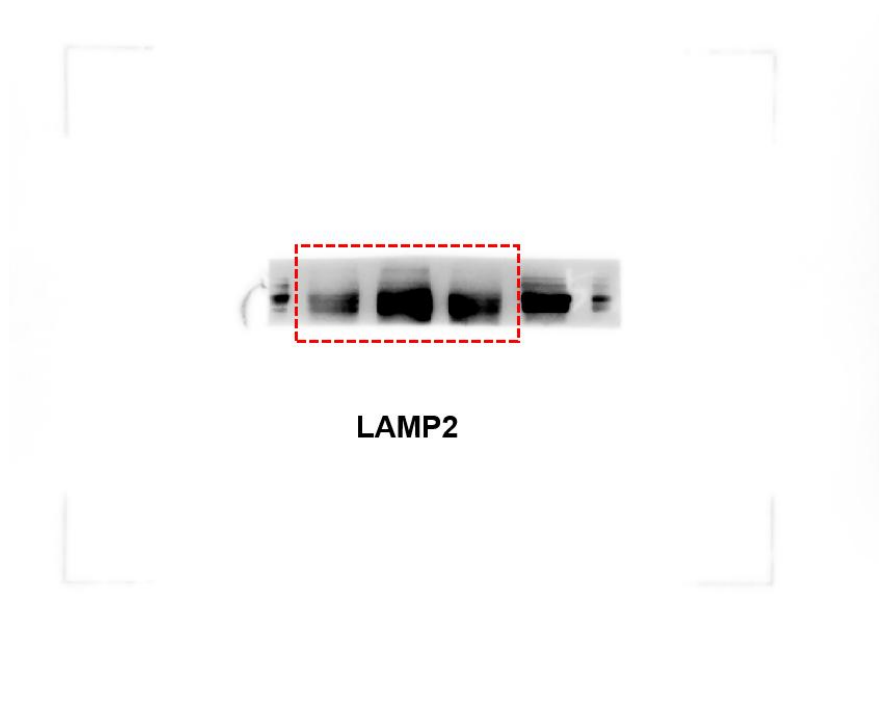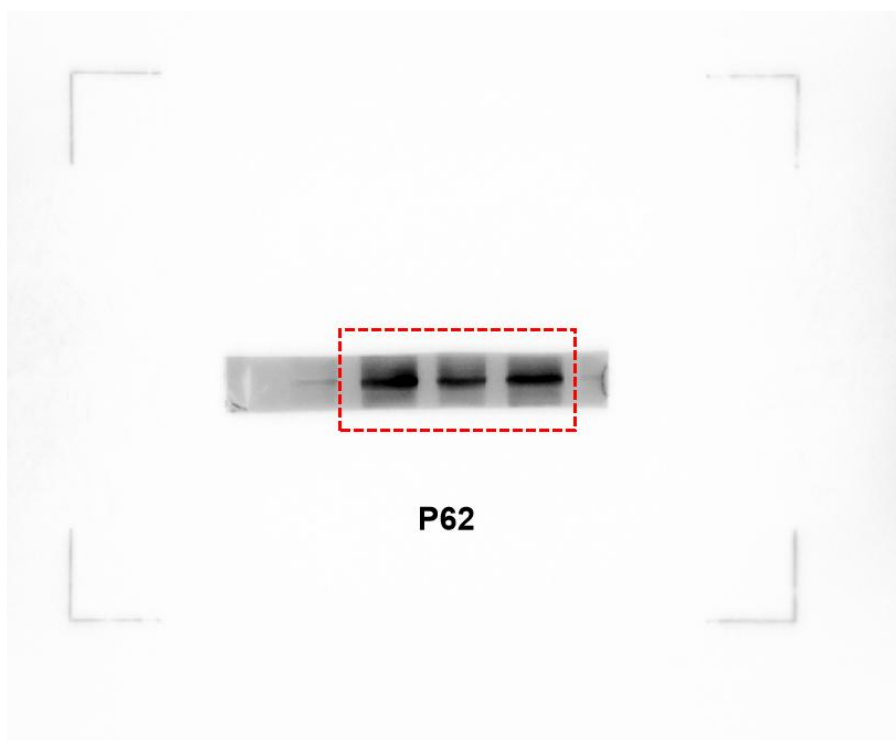

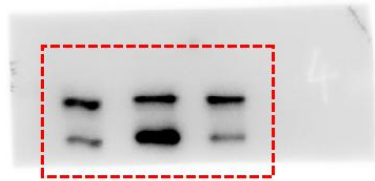

**LC3**

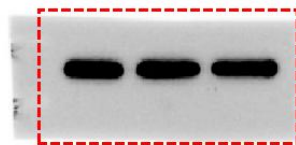

**Caspase 3**



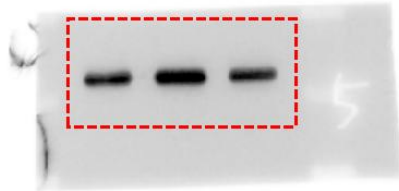

**cleaved Caspase 3**

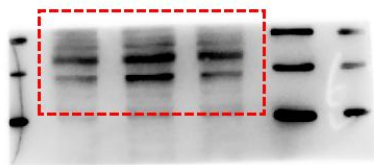

**Caspase 9 & cleaved Caspase 9**

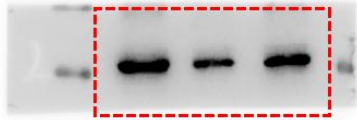

**Bcl 2**

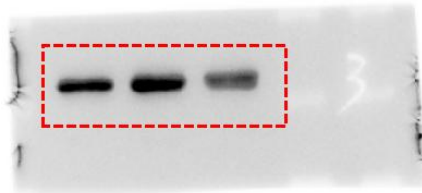

**Bax**

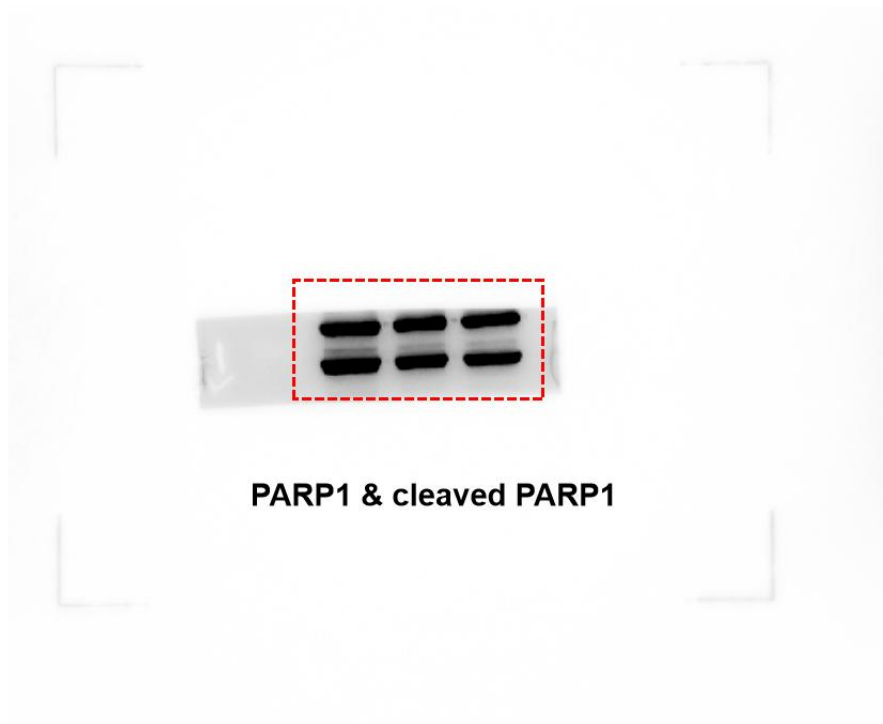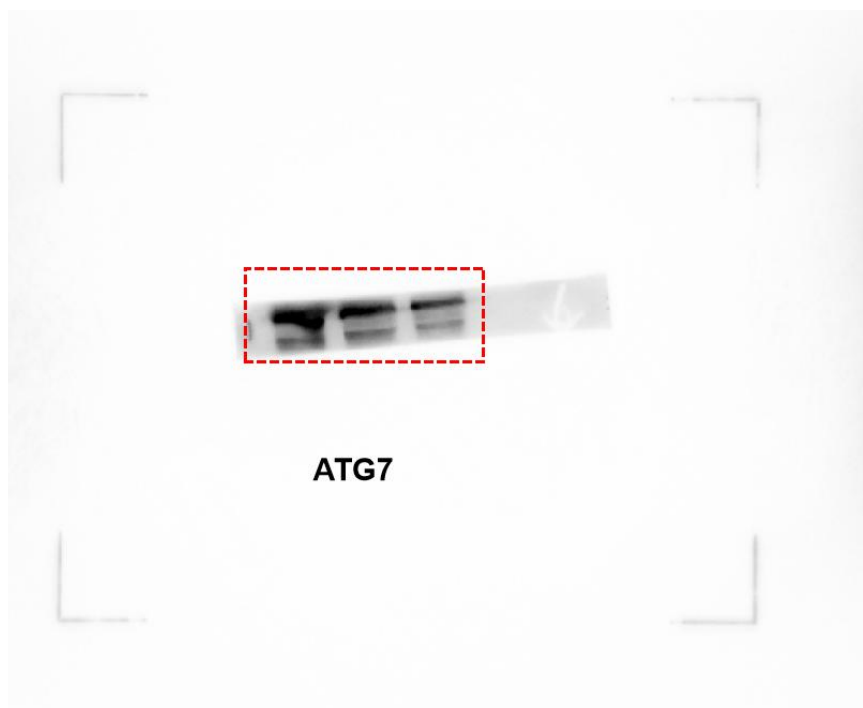

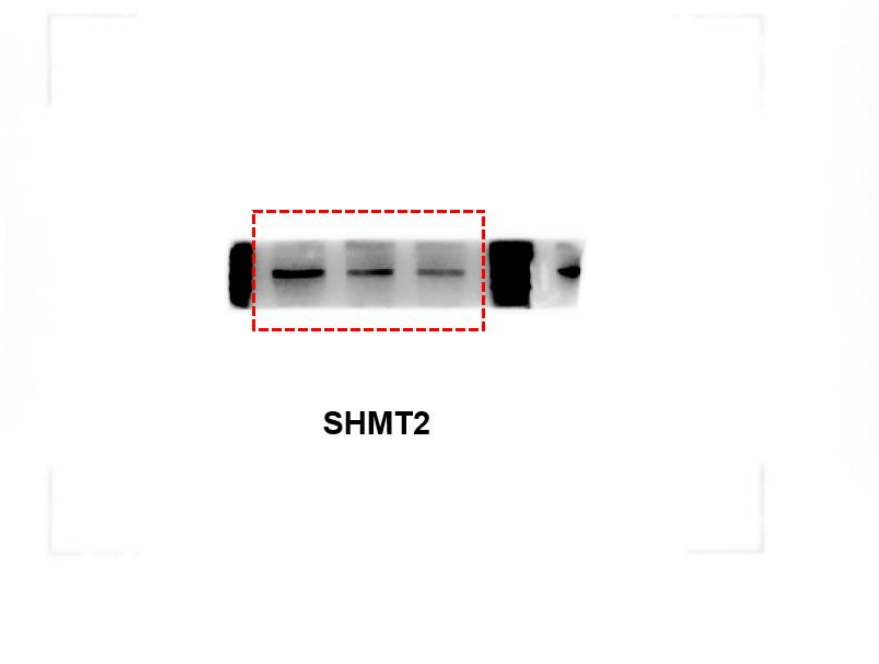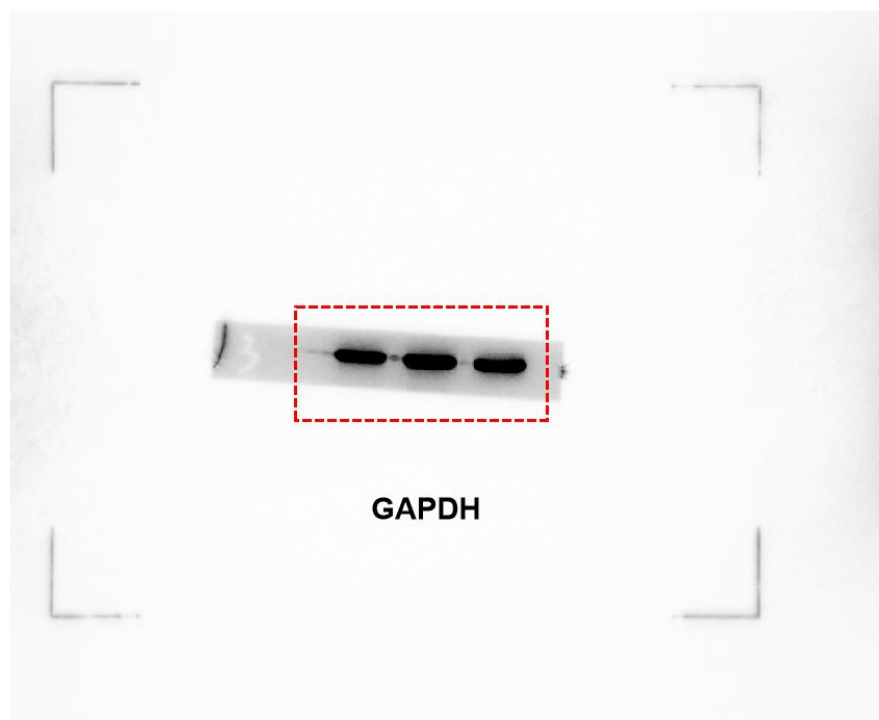

**Figure S7B**

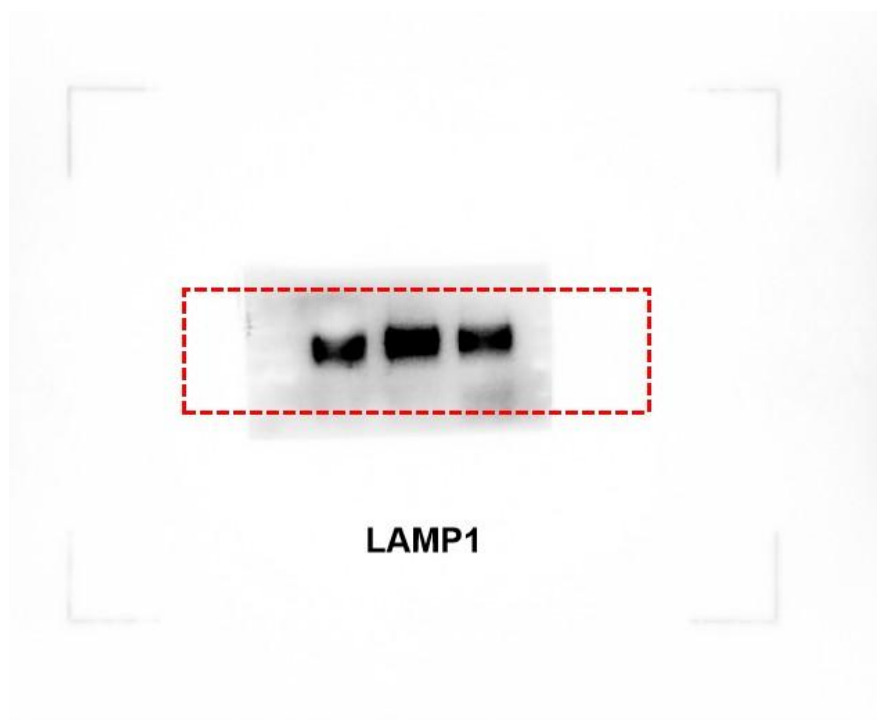

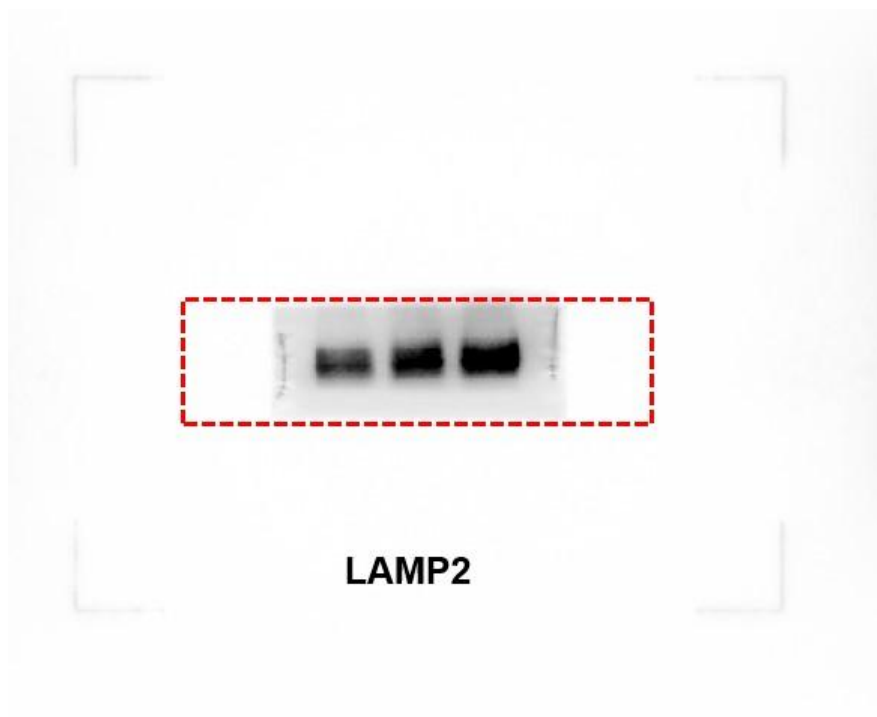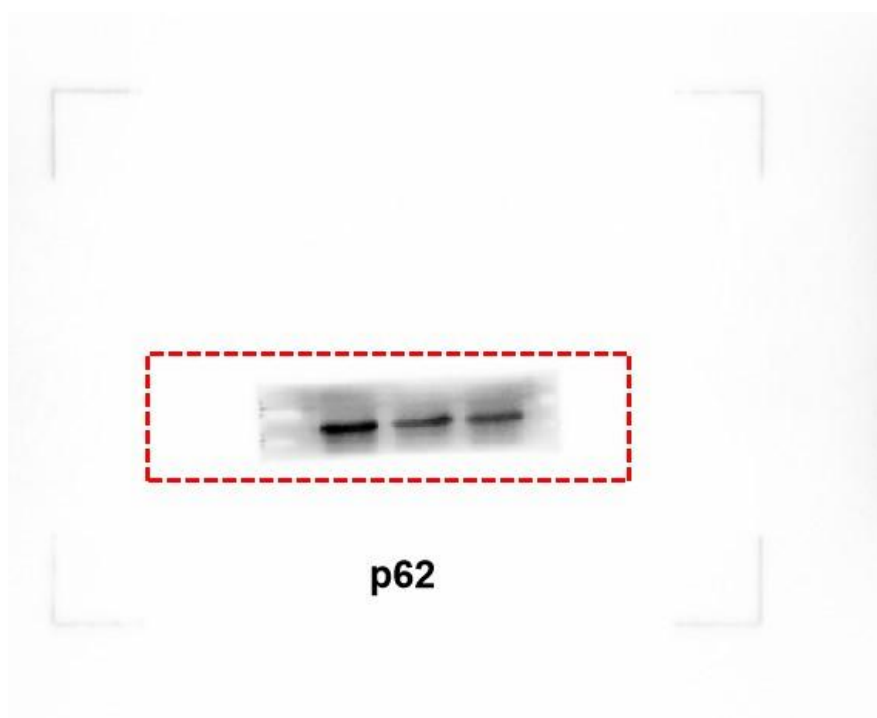

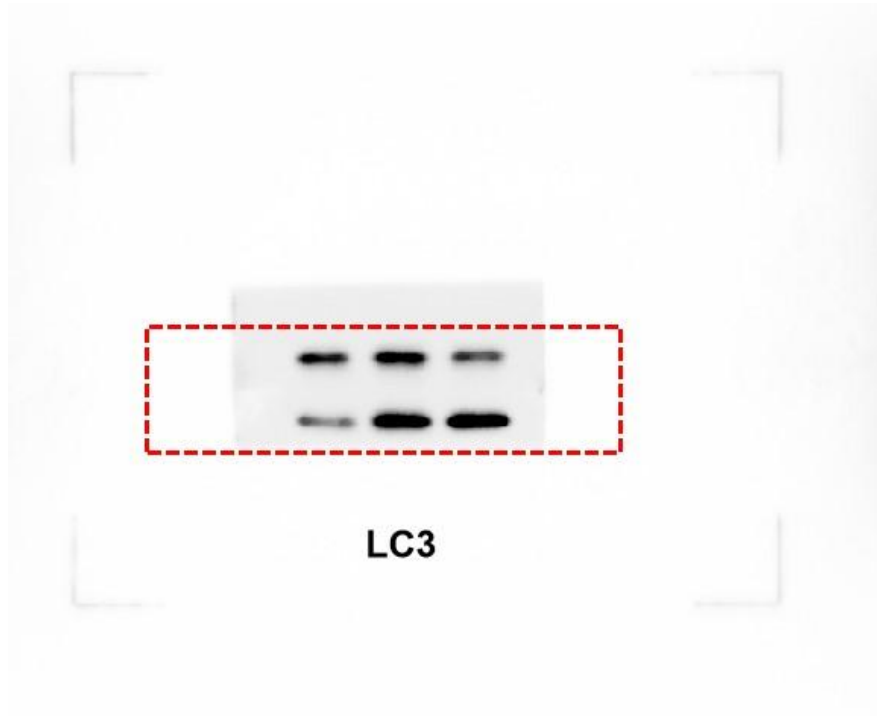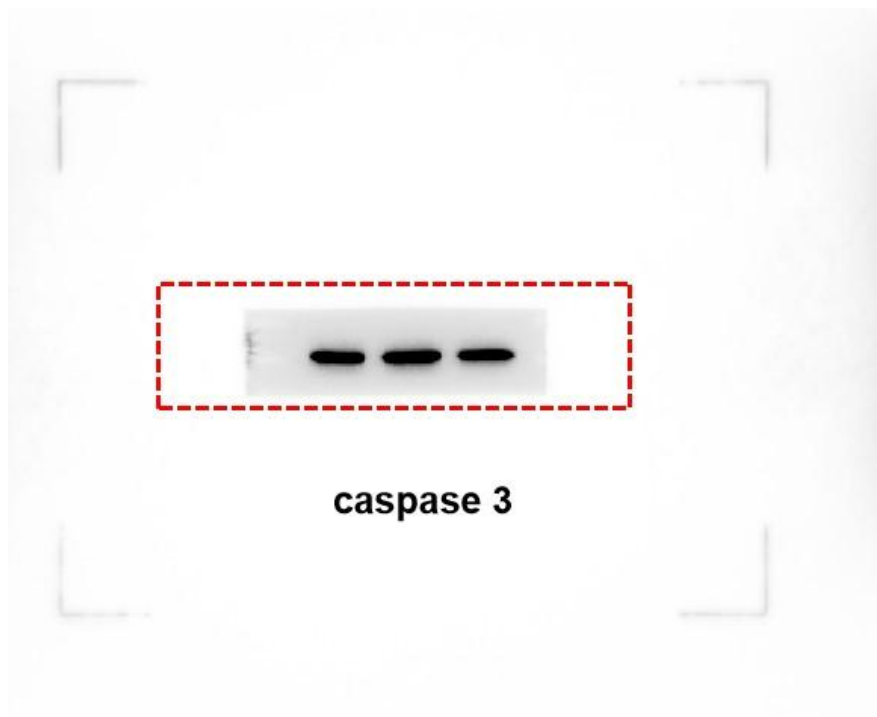

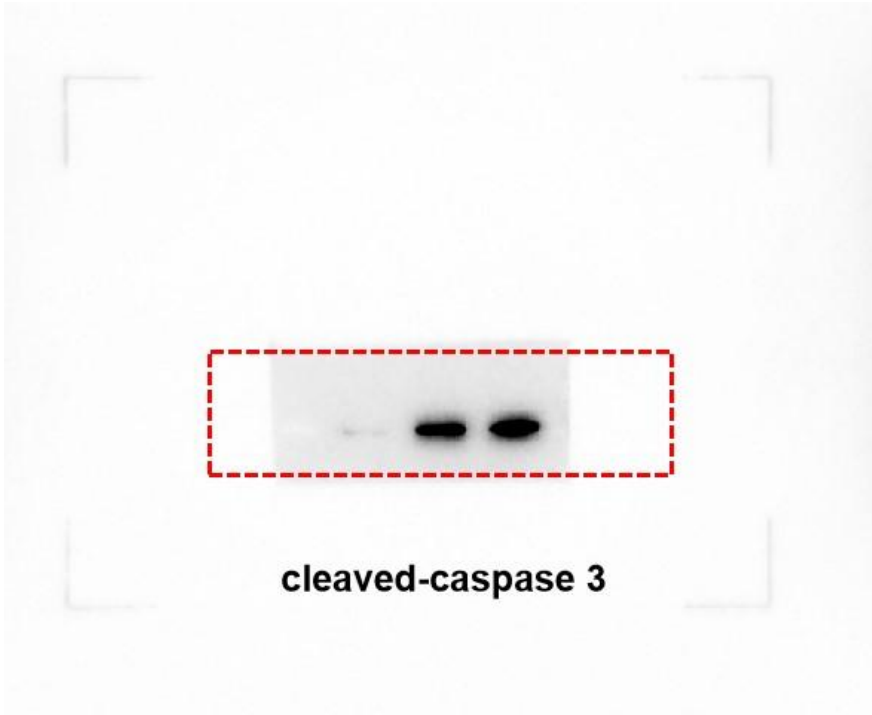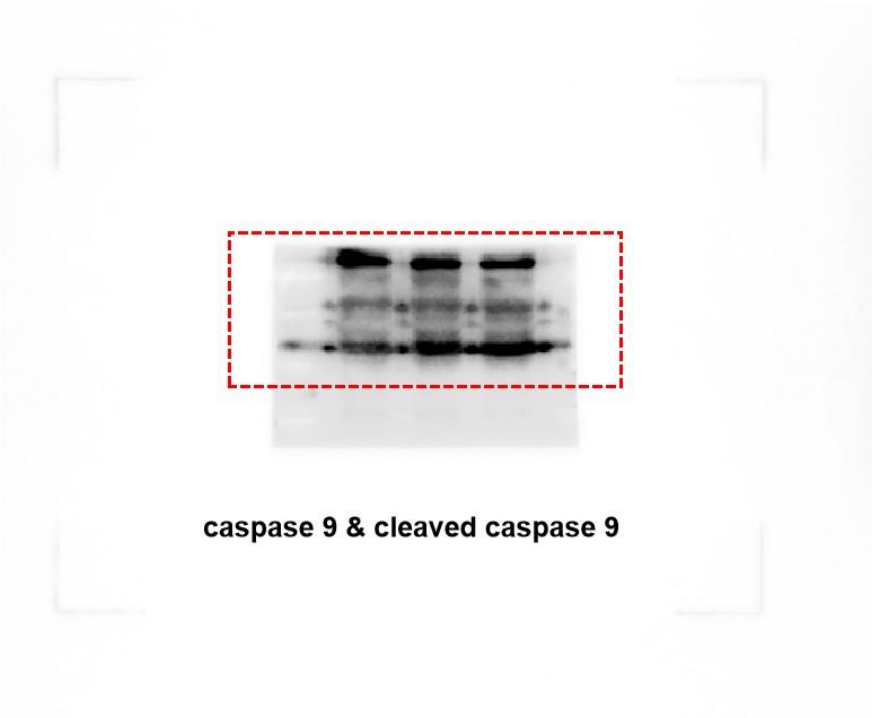



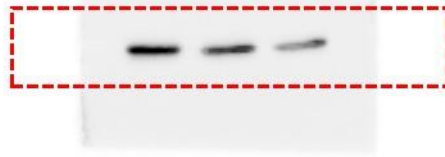

**Bcl-2**

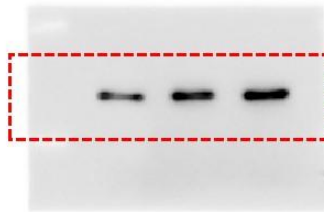

**Bax**

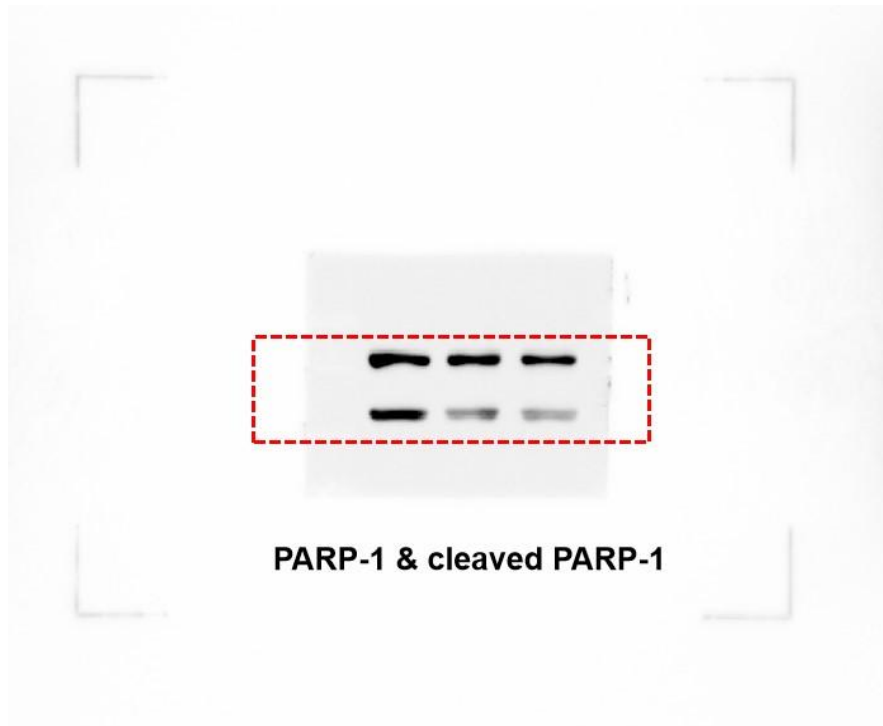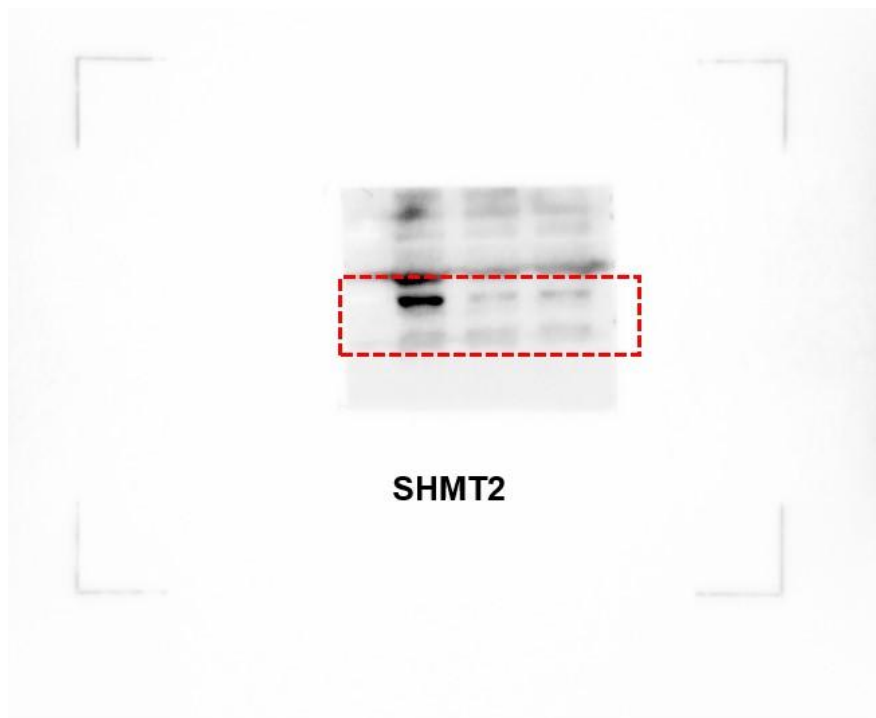

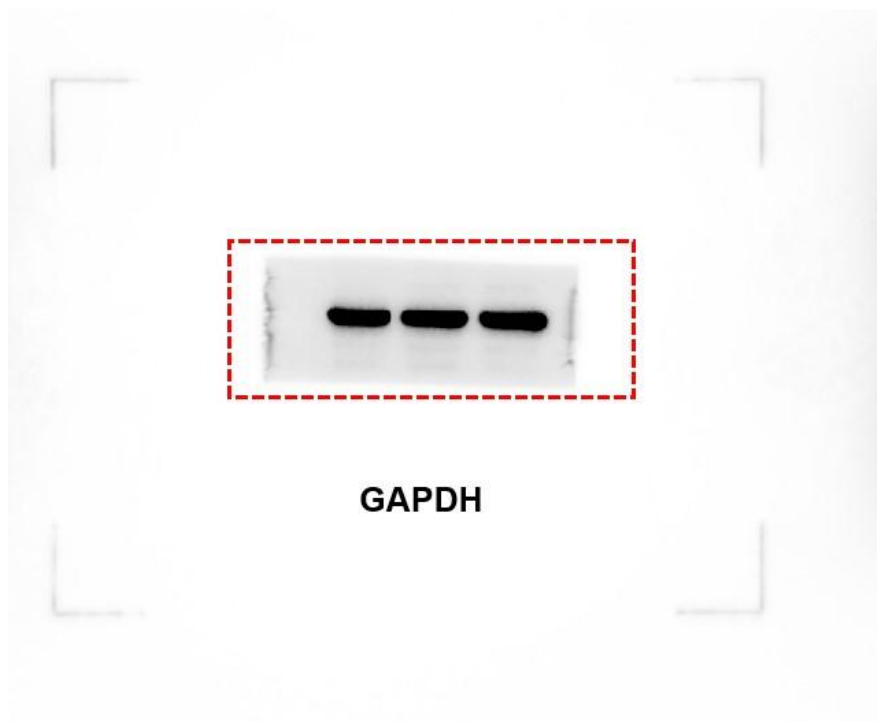

Supplement: 41419_2023_5677_MOESM2_ESM.pdf [file 41419_2023_5677_MOESM2_ESM.pdf]
